# Supplementary material
Source: PubMed Central journal article supplement (PMC4664176)

## Supplementary Online Content

The Emerging Risk Factors Collaboration. Association of cardiometabolic multimorbidity with mortality. *JAMA*. doi:10.1001/jama.2015.7008

**eTable 1.** Characteristics of the prospective studies contributing to the current analysis

**eTable 2.** Study-specific definition of known history of diabetes, myocardial infarction and stroke at baseline

**eTable 3.** Hazard ratios for all-cause mortality according to participants' disease status at baseline in UK Biobank

**eTable 4.** Estimated future years of life lost according to participants' disease status at baseline, age, and sex

**eTable 5.** Summary of prospective studies included in the literature-based systematic review

**eFigure 1.** Study design

**eFigure 2.** Hazard ratios for all-cause mortality according to participants' disease status at baseline, against follow-up time

**eFigure 3.** Sex-specific hazard ratios for all-cause mortality according to participants' disease status at baseline

**eFigure 4.** Hazard ratios for CVD mortality, cancer mortality, and non-CVD non-cancer mortality according to participants' disease status at baseline

**eFigure 5.** Hazard ratios for all-cause mortality according to participants' disease status at baseline, by study-specific definitions of baseline diseases

**eFigure 6.** Hazard ratios for all-cause mortality according to participants' disease status at baseline, by study-specific methods of ascertainment of death

**eFigure 7.** Hazard ratios for all-cause mortality according to participants' disease status at baseline, after excluding the first 5 years of follow-up

**eFigure 8.** Hazard ratios for all-cause mortality according to participants' disease status at baseline, with study-specific estimates pooled using fixed-effect meta-analysis.

**eFigure 9.** Hazard ratios for all-cause mortality according to participants' disease status at baseline and by median year of survey

**eFigure 10.** Estimated future years of life lost due to comorbidity with diabetes and prior MI or stroke, attributable to vascular, cancer and other mortality causes

**eFigure 11.** Estimated future years of life lost according to diabetes, MI and stroke status in the European Union

**eAppendix 1.** Investigators of the Emerging Risk Factors Collaboration

**eAppendix 2.** List of study acronyms

**eAppendix 3.** UK Biobank

**eAppendix 4.** Systematic review

**eAppendix 5.** Statistical methods

This supplementary material has been provided by the authors to give readers additional information about their work.

**eTable 1. Characteristics of the prospective studies contributing to the current analysis**

| Cohort abbreviation     | Country     | Median year of baseline | Date of last follow-up | No. of individuals | Age at survey (yrs) mean (sd) |                    | Individuals               | Individuals           | Individuals | Median years of follow-up (5th & 95th percentiles) | All-cause deaths* | Cardiovascular deaths | Cancer deaths | Nonvascular, noncancer deaths | Person-years of follow-up |
|-------------------------|-------------|-------------------------|------------------------|--------------------|-------------------------------|--------------------|---------------------------|-----------------------|-------------|----------------------------------------------------|-------------------|-----------------------|---------------|-------------------------------|---------------------------|
|                         |             |                         |                        |                    | Male (%)                      | w ith diabetes (%) | w ith previous stroke (%) | w ith previous MI (%) |             |                                                    |                   |                       |               |                               |                           |
| ARIC <sup>1</sup>       | USA         | 1988                    | 2002                   | 14121              | 55 (6)                        | 6551 (46)          | 1643 (11.6)               | 422 (3.0)             | 647 (4.6)   | 14.1 (6.7 to 15.7)                                 | 1987              | 753                   | 744           | 450                           | 184166                    |
| A TENA <sup>2</sup>     | Italy       | 1995                    | 2001                   | 4774               | 50 (7)                        | 0 (0)              | 120 (2.5)                 | 8 (0.2)               | 15 (0.3)    | 6.7 (5.2 to 8.1)                                   | 44                | 12                    | 22            | 9                             | 31891                     |
| A USDIAB <sup>3</sup>   | Australia   | 2000                    | 2012                   | 9542               | 54 (13)                       | 4298 (45)          | 507 (5.3)                 | 279 (2.9)             | 487 (5.1)   | 12.6 (7.1 to 13.5)                                 | 1068              | 229                   | 276           | 205                           | 59178                     |
| BHS <sup>4</sup>        | Australia   | 1972                    | 2004                   | 6287               | 45 (16)                       | 2988 (48)          | 102 (1.6)                 | 33 (0.5)              | 76 (1.2)    | 24.7 (6.4 to 33.2)                                 | 2123              | 1019                  | 583           | 503                           | 150450                    |
| BRHS <sup>5</sup>       | UK          | 1979                    | 2005                   | 7134               | 50 (6)                        | 7134 (100)         | 91 (1.3)                  | 49 (0.7)              | 291 (4.1)   | 24.5 (6.6 to 25.4)                                 | 2679              | 1253                  | 853           | 401                           | 141142                    |
| BRUN <sup>6</sup>       | Italy       | 1990                    | 2010                   | 823                | 58 (11)                       | 409 (50)           | 27 (3.3)                  | 11 (1.3)              | 19 (2.3)    | 20.3 (5.4 to 20.5)                                 | 272               | 97                    | 84            | 87                            | 13797                     |
| BWHHS <sup>7</sup>      | UK          | 2000                    | 2011                   | 3377               | 69 (5)                        | 0 (0)              | 156 (4.6)                 | 150 (4.4)             | 236 (7.0)   | 11.0 (4.0 to 12.2)                                 | 704               | 222                   | 259           | 216                           | 23234                     |
| CAPS <sup>8</sup>       | UK          | 1981                    | 1996                   | 2435               | 52 (5)                        | 2435 (100)         | 44 (1.8)                  | 43 (1.8)              | 253 (10.4)  | 13.0 (5.2 to 13.0)                                 | 481               | 260                   | 147           | 74                            | 28181                     |
| CASTEL <sup>9</sup>     | Italy       | 1984                    | 1996                   | 2807               | 74 (5)                        | 1103 (39)          | 381 (13.6)                | 129 (4.6)             | 117 (4.2)   | 11.2 (2.1 to 14.0)                                 | 1334              | 676                   | 309           | 329                           | 26879                     |
| CHARL <sup>10</sup>     | USA         | 1961                    | 2000                   | 2179               | 50 (11)                       | 1031 (47)          | 94 (4.3)                  | 35 (1.6)              | 119 (5.5)   | 26.6 (3.5 to 40.0)                                 | 1630              | 862                   | 338           | 364                           | 50305                     |
| CHS <sup>11</sup>       | USA         | 1990                    | 2005                   | 4973               | 72 (5)                        | 2053 (41)          | 793 (15.9)                | 209 (4.2)             | 560 (11.3)  | 12.6 (2.7 to 15.9)                                 | 2789              | 1069                  | 686           | 1002                          | 46153                     |
| COPEN <sup>13</sup>     | Denmark     | 1993                    | 2013                   | 9083               | 58 (15)                       | 3969 (44)          | 287 (3.2)                 | 193 (2.1)             | 311 (3.4)   | 19.1 (2.8 to 21.2)                                 | 4274              | 1198                  | 811           | 1486                          | 121634                    |
| DESIR <sup>14</sup>     | France      | 1995                    | 2010                   | 3841               | 48 (10)                       | 1891 (49)          | 125 (3.3)                 | 11 (0.3)              | 13 (0.3)    | 14.4 (13.5 to 15.0)                                | 75                | 22                    | 31            | 14                            | 33937                     |
| DISCO <sup>15</sup>     | Italy       | 1987                    | 1992                   | 1897               | 50 (11)                       | 857 (45)           | 86 (4.5)                  | 30 (1.6)              | 41 (2.2)    | 5.5 (5.5 to 9.5)                                   | 30                | 13                    | 10            | 7                             | 12846                     |
| DUBBO <sup>16</sup>     | Australia   | 1989                    | 2003                   | 2462               | 69 (7)                        | 1085 (44)          | 199 (8.1)                 | 131 (5.3)             | 309 (12.6)  | 14.1 (2.1 to 15.0)                                 | 1082              | 550                   | 230           | 265                           | 25933                     |
| EAS <sup>17</sup>       | Scotland    | 1988                    | 2008                   | 1110               | 64 (6)                        | 569 (51)           | 59 (5.3)                  | 39 (3.5)              | 70 (6.3)    | 20.0 (3.2 to 21.3)                                 | 579               | 204                   | 188           | 143                           | 16891                     |
| EMOFRI <sup>2</sup>     | Italy       | 1996                    | 2002                   | 399                | 55 (6)                        | 199 (50)           | 22 (5.5)                  | 29 (7.3)              | 12 (3.0)    | 6.7 (6.5 to 7.2)                                   | 12                | 7                     | 2             | 2                             | 2649                      |
| EPESEBOS <sup>18</sup>  | USA         | 1982                    | 1993                   | 1180               | 72 (5)                        | 428 (36)           | 152 (12.9)                | 37 (3.1)              | 119 (10.1)  | 11.4 (7.6 to 11.9)                                 | 265               | 125                   | 40            | 75                            | 11487                     |
| EPESEIOW <sup>18</sup>  | USA         | 1982                    | 2008                   | 1865               | 73 (5)                        | 654 (35)           | 142 (7.6)                 | 94 (5.0)              | 205 (11.0)  | 15.4 (7.3 to 26.5)                                 | 1709              | 794                   | 188           | 528                           | 18599                     |
| EPESENCA <sup>18</sup>  | USA         | 1986                    | 2006                   | 1633               | 72 (5)                        | 568 (35)           | 241 (14.8)                | 90 (5.5)              | 227 (13.9)  | 13.6 (7.7 to 20.7)                                 | 1071              | 487                   | 173           | 345                           | 15709                     |
| EPESENHA <sup>18</sup>  | USA         | 1982                    | 1992                   | 971                | 73 (6)                        | 377 (39)           | 110 (11.3)                | 55 (5.7)              | 115 (11.8)  | 10.5 (7.2 to 10.8)                                 | 256               | 149                   | 13            | 47                            | 9346                      |
| EPICNOR <sup>19</sup>   | UK          | 1996                    | 2005                   | 21601              | 59 (9)                        | 9854 (46)          | 477 (2.2)                 | 290 (1.3)             | 671 (3.1)   | 9.8 (6.2 to 12.0)                                  | 357               | 357                   | 0             | 0                             | 205064                    |
| ESTHER <sup>20</sup>    | Germany     | 2001                    | 2008                   | 8308               | 62 (7)                        | 3740 (45)          | 1109 (13.3)               | 263 (3.2)             | 506 (6.1)   | 5.1 (2.0 to 5.9)                                   | 370               | 108                   | 174           | 65                            | 37970                     |
| FINE_FIN <sup>21</sup>  | Finland     | 1989                    | 1999                   | 360                | 77 (5)                        | 360 (100)          | 32 (8.9)                  | 27 (7.5)              | 70 (19.4)   | 7.8 (0.9 to 10.0)                                  | 221               | 115                   | 52            | 53                            | 1937                      |
| FINE_IT <sup>21</sup>   | Italy       | 1985                    | 2006                   | 541                | 73 (5)                        | 541 (100)          | 47 (8.7)                  | 36 (6.7)              | 34 (6.3)    | 11.0 (1.7 to 21.4)                                 | 464               | 226                   | 129           | 64                            | 5612                      |
| FINNMARK <sup>12</sup>  | Norway      | 2002                    | 2009                   | 5777               | 59 (10)                       | 2719 (47)          | 284 (4.9)                 | 172 (3.0)             | 403 (7.0)   | 7.5 (4.0 to 7.5)                                   | 498               | 173                   | 180           | 107                           | 41508                     |
| FINRISK92 <sup>22</sup> | Finland     | 1992                    | 2008                   | 5984               | 45 (11)                       | 2820 (47)          | 109 (1.8)                 | 92 (1.5)              | 147 (2.5)   | 16.9 (10.4 to 16.9)                                | 373               | 137                   | 104           | 131                           | 94514                     |
| FINRISK97 <sup>22</sup> | Finland     | 1997                    | 2008                   | 7560               | 50 (12)                       | 3805 (50)          | 256 (3.4)                 | 178 (2.4)             | 269 (3.6)   | 11.8 (11.7 to 11.9)                                | 339               | 131                   | 89            | 116                           | 85293                     |
| FRAMOFF <sup>23</sup>   | USA         | 1999                    | 2005                   | 2804               | 60 (9)                        | 1242 (44)          | 312 (11.1)                | 21 (0.7)              | 41 (1.5)    | 5.2 (3.1 to 7.0)                                   | 131               | 16                    | 59            | 34                            | 14621                     |
| GOTO13 <sup>24</sup>    | Sw eden     | 1963                    | 1998                   | 779                | 50 (0)                        | 779 (100)          | 6 (0.8)                   | 2 (0.3)               | 7 (0.9)     | 29.7 (10.9 to 34.5)                                | 552               | 289                   | 143           | 67                            | 19302                     |
| GOTO33 <sup>24</sup>    | Sw eden     | 1984                    | 1998                   | 740                | 51 (0)                        | 740 (100)          | 25 (3.4)                  | 7 (0.9)               | 14 (1.9)    | 12.8 (6.8 to 13.1)                                 | 87                | 28                    | 27            | 29                            | 8898                      |
| GOTO43 <sup>24</sup>    | Sw eden     | 1993                    | 2003                   | 788                | 50 (0)                        | 788 (100)          | 19 (2.4)                  | 3 (0.4)               | 16 (2.0)    | 10.0 (9.6 to 10.7)                                 | 28                | 6                     | 16            | 5                             | 8478                      |
| GOTOW <sup>25</sup>     | Sw eden     | 1969                    | 2009                   | 1392               | 47 (6)                        | 0 (0)              | 14 (1.0)                  | 3 (0.2)               | 2 (0.1)     | 37.8 (11.9 to 41.1)                                | 852               | 354                   | 221           | 214                           | 38659                     |
| GRIPS <sup>26</sup>     | Germany     | 1982                    | 1992                   | 5846               | 48 (5)                        | 5846 (100)         | 116 (2.0)                 | 9 (0.2)               | 51 (0.9)    | 9.8 (8.5 to 10.0)                                  | 339               | 155                   | 109           | 74                            | 54086                     |
| HCS <sup>27</sup>       | UK          | 2001                    | 2010                   | 2917               | 66 (3)                        | 1503 (52)          | 395 (13.5)                | 112 (3.8)             | 111 (3.8)   | 8.8 (4.9 to 11.6)                                  | 312               | 80                    | 165           | 66                            | 25434                     |
| HIMS <sup>28</sup>      | Australia   | 1997                    | 2010                   | 10942              | 72 (4)                        | 10942 (100)        | 1218 (11.1)               | 801 (7.3)             | 1711 (15.6) | 12.6 (2.3 to 14.2)                                 | 5020              | 1683                  | 1851          | 1436                          | 90642                     |
| HONOL <sup>29</sup>     | USA         | 1992                    | 1999                   | 3266               | 78 (4)                        | 3266 (100)         | 950 (29.1)                | 172 (5.3)             | 694 (21.2)  | 6.3 (1.7 to 7.6)                                   | 871               | 287                   | 243           | 216                           | 18519                     |
| HOORN <sup>30</sup>     | Netherlands | 1991                    | 2005                   | 2314               | 61 (7)                        | 1046 (45)          | 218 (9.4)                 | 33 (1.4)              | 65 (2.8)    | 13.6 (4.0 to 14.7)                                 | 525               | 191                   | 151           | 55                            | 18930                     |
| HUBRO <sup>12</sup>     | Norway      | 2001                    | 2009                   | 16456              | 52 (14)                       | 7328 (45)          | 510 (3.1)                 | 365 (2.2)             | 477 (2.9)   | 8.5 (6.0 to 9.5)                                   | 1224              | 348                   | 467           | 321                           | 141618                    |
| KIHD <sup>33</sup>      | Finland     | 1987                    | 2009                   | 2319               | 53 (5)                        | 2319 (100)         | 116 (5.0)                 | 49 (2.1)              | 215 (9.3)   | 21.7 (5.1 to 25.2)                                 | 751               | 355                   | 207           | 182                           | 39821                     |
| LASA <sup>34</sup>      | Netherlands | 1993                    | 2003                   | 2269               | 70 (9)                        | 1110 (49)          | 180 (7.9)                 | 140 (6.2)             | 263 (11.6)  | 9.9 (1.7 to 10.5)                                  | 788               | 0                     | 0             | 0                             | 17467                     |
| LEADER <sup>35</sup>    | UK          | 1997                    | 2001                   | 1359               | 68 (9)                        | 1359 (100)         | 227 (16.7)                | 157 (11.6)            | 310 (22.8)  | 4.3 (1.1 to 6.1)                                   | 335               | 172                   | 90            | 64                            | 5284                      |
| MATISS83 <sup>2</sup>   | Italy       | 1984                    | 2002                   | 2605               | 52 (10)                       | 1227 (47)          | 127 (4.9)                 | 20 (0.8)              | 33 (1.3)    | 18.7 (6.0 to 19.5)                                 | 514               | 268                   | 96            | 68                            | 44183                     |
| MATISS87 <sup>2</sup>   | Italy       | 1987                    | 2002                   | 2107               | 52 (9)                        | 942 (45)           | 85 (4.0)                  | 19 (0.9)              | 26 (1.2)    | 15.6 (7.2 to 16.2)                                 | 266               | 131                   | 46            | 41                            | 30948                     |
| MATISS93 <sup>2</sup>   | Italy       | 1994                    | 2002                   | 1239               | 49 (9)                        | 610 (49)           | 60 (4.8)                  | 12 (1.0)              | 20 (1.6)    | 8.3 (7.0 to 9.3)                                   | 42                | 22                    | 5             | 10                            | 10110                     |
| MCV DRFP <sup>37</sup>  | Netherlands | 1989                    | 2007                   | 24000              | 42 (10)                       | 11260 (47)         | 266 (1.1)                 | 185 (0.8)             | 314 (1.3)   | 16.7 (10.0 to 18.9)                                | 1920              | 527                   | 894           | 381                           | 385982                    |

eTable 1. cont'd

| Cohort abbreviation        | Country       | Median year of baseline | Date of last follow-up | No. of individuals | Age at survey (yrs) mean |             | Individuals        | Individuals               | Individuals           | Median years of follow-up (5th & 95th percentiles) | All-cause deaths* | Cardiovascular deaths | Cancer deaths | Nonvascular, Person-years |              |
|----------------------------|---------------|-------------------------|------------------------|--------------------|--------------------------|-------------|--------------------|---------------------------|-----------------------|----------------------------------------------------|-------------------|-----------------------|---------------|---------------------------|--------------|
|                            |               |                         |                        |                    | (sd)                     | Male (%)    | w ith diabetes (%) | w ith previous stroke (%) | w ith previous MI (%) |                                                    |                   |                       |               | noncancer deaths          | of follow-up |
| MDC <sup>38</sup>          | Sw eden       | 1994                    | 2010                   | 19292              | 58 (7)                   | 8430 (44)   | 832 (4.3)          | 236 (1.2)                 | 463 (2.4)             | 16.3 (6.0 to 19.1)                                 | 4098              | 1379                  | 1795          | 836                       | 281551       |
| MDFAM <sup>39</sup>        | UK            | 1996                    | 2011                   | 2310               | 45 (6)                   | 1032 (45)   | 27 (1.2)           | 11 (0.5)                  | 117 (5.1)             | 15.4 (14.2 to 15.8)                                | 129               | 24                    | 62            | 38                        | 34857        |
| MIDRP <sup>40</sup>        | UK            | 1975                    | 2010                   | 12106              | 55 (6)                   | 5573 (46)   | 153 (1.3)          | 147 (1.2)                 | 1106 (9.1)            | 24.2 (4.4 to 36.8)                                 | 9826              | 4747                  | 2728          | 2296                      | 266241       |
| MONFRIB <sup>62</sup>      | Italy         | 1986                    | 2002                   | 1159               | 49 (9)                   | 568 (49)    | 12 (1.0)           | 7 (0.6)                   | 15 (1.3)              | 16.7 (6.4 to 16.9)                                 | 156               | 63                    | 34            | 20                        | 18181        |
| MONFRIB <sup>92</sup>      | Italy         | 1989                    | 2002                   | 1135               | 49 (8)                   | 566 (50)    | 15 (1.3)           | 6 (0.5)                   | 28 (2.5)              | 13.6 (8.4 to 13.7)                                 | 93                | 44                    | 13            | 17                        | 14709        |
| MONFRIB <sup>94</sup>      | Italy         | 1994                    | 2002                   | 1364               | 49 (8)                   | 677 (50)    | 61 (4.5)           | 53 (3.9)                  | 23 (1.7)              | 8.5 (8.2 to 8.8)                                   | 57                | 22                    | 7             | 8                         | 11298        |
| MONICA_KORA1 <sup>41</sup> | Germany       | 1985                    | 1998                   | 923                | 54 (6)                   | 923 (100)   | 45 (4.9)           | 17 (1.8)                  | 35 (3.8)              | 13.0 (4.5 to 13.5)                                 | 176               | 90                    | 53            | 32                        | 10641        |
| MONICA_KORA2 <sup>41</sup> | Germany       | 1990                    | 1998                   | 4193               | 53 (12)                  | 2103 (50)   | 234 (5.6)          | 63 (1.5)                  | 117 (2.8)             | 7.9 (5.3 to 8.4)                                   | 338               | 148                   | 107           | 79                        | 30045        |
| MONICA_KORA3 <sup>41</sup> | Germany       | 1995                    | 2009                   | 4710               | 50 (14)                  | 2326 (49)   | 223 (4.7)          | 95 (2.0)                  | 96 (2.0)              | 14.0 (6.0 to 14.7)                                 | 692               | 279                   | 224           | 167                       | 59051        |
| MORGEN <sup>42</sup>       | Netherlands   | 1995                    | 2007                   | 18860              | 46 (9)                   | 8674 (46)   | 275 (1.5)          | 186 (1.0)                 | 269 (1.4)             | 10.8 (6.0 to 13.0)                                 | 647               | 182                   | 332           | 103                       | 195521       |
| MOSWEGOT <sup>43</sup>     | Sw eden       | 1990                    | 2003                   | 4249               | 47 (11)                  | 2040 (48)   | 107 (2.5)          | 52 (1.2)                  | 59 (1.4)              | 13.0 (8.0 to 18.6)                                 | 308               | 105                   | 133           | 65                        | 57496        |
| MPP <sup>36</sup>          | Sw eden       | 1980                    | 2010                   | 31911              | 46 (7)                   | 21920 (69)  | 349 (1.1)          | 113 (0.4)                 | 245 (0.8)             | 29.3 (10.1 to 34.1)                                | 9812              | 3574                  | 3672          | 2307                      | 802712       |
| MRCOLD <sup>44</sup>       | UK            | 1996                    | 2007                   | 13248              | 80 (4)                   | 5237 (40)   | 1039 (7.8)         | 1152 (8.7)                | 1494 (11.3)           | 7.8 (0.9 to 11.7)                                  | 8824              | 3977                  | 1702          | 2872                      | 94742        |
| MRFIT <sup>45</sup>        | USA           | 1974                    | 1985                   | 12270              | 47 (6)                   | 12270 (100) | 108 (0.9)          | 5 (0.0)                   | 7 (0.1)               | 11.0 (8.3 to 11.8)                                 | 981               | 529                   | 278           | 168                       | 85170        |
| NCS1 <sup>46</sup>         | Norw ay       | 1976                    | 1993                   | 24316              | 42 (4)                   | 12014 (49)  | 183 (0.8)          | 25 (0.1)                  | 86 (0.4)              | 16.1 (14.2 to 16.7)                                | 1481              | 578                   | 565           | 256                       | 382133       |
| NCS2 <sup>46</sup>         | Norw ay       | 1975                    | 1993                   | 13171              | 42 (4)                   | 6741 (51)   | 72 (0.5)           | 34 (0.3)                  | 50 (0.4)              | 17.3 (15.3 to 17.8)                                | 844               | 304                   | 336           | 147                       | 223176       |
| NCS3 <sup>46</sup>         | Norw ay       | 1974                    | 1993                   | 10249              | 42 (4)                   | 5347 (52)   | 35 (0.3)           | 27 (0.3)                  | 66 (0.6)              | 18.2 (11.7 to 18.8)                                | 1056              | 517                   | 292           | 145                       | 179604       |
| NFR <sup>15</sup>          | Italy         | 1980                    | 1991                   | 3293               | 55 (5)                   | 3293 (100)  | 222 (6.7)          | 32 (1.0)                  | 146 (4.4)             | 10.2 (5.7 to 11.2)                                 | 392               | 159                   | 168           | 47                        | 32169        |
| NHANESII <sup>47</sup>     | USA           | 1973                    | 1993                   | 11728              | 50 (15)                  | 4773 (41)   | 701 (6.0)          | 296 (2.5)                 | 747 (6.4)             | 18.3 (10.2 to 21.0)                                | 3550              | 1802                  | 863           | 828                       | 186808       |
| NHANESIII <sup>48</sup>    | USA           | 1990                    | 2008                   | 16017              | 52 (18)                  | 7547 (47)   | 1439 (9.0)         | 599 (3.7)                 | 998 (6.2)             | 14.2 (3.0 to 17.7)                                 | 4640              | 2088                  | 1053          | 1413                      | 209386       |
| OPPHED <sup>12</sup>       | Norw ay       | 2001                    | 2009                   | 9783               | 53 (13)                  | 4552 (47)   | 300 (3.1)          | 214 (2.2)                 | 350 (3.6)             | 8.5 (6.0 to 9.5)                                   | 734               | 239                   | 274           | 167                       | 81986        |
| OSAKA <sup>50</sup>        | Japan         | 1992                    | 2008                   | 12523              | 52 (10)                  | 8529 (68)   | 623 (5.0)          | 114 (0.9)                 | 29 (2.0)              | 10.2 (3.9 to 18.8)                                 | 707               | 141                   | 230           | 168                       | 140564       |
| OSLO <sup>51</sup>         | Norw ay       | 1973                    | 2003                   | 17586              | 44 (6)                   | 17586 (100) | 151 (0.9)          | 31 (0.2)                  | 165 (0.9)             | 29.5 (10.6 to 30.5)                                | 6089              | 2755                  | 2055          | 1088                      | 462041       |
| OSLO <sup>212</sup>        | Norw ay       | 2000                    | 2009                   | 6037               | 69 (6)                   | 6037 (100)  | 383 (6.3)          | 364 (6.0)                 | 668 (11.1)            | 9.5 (2.0 to 9.5)                                   | 1475              | 459                   | 587           | 298                       | 50937        |
| PREVEND <sup>52</sup>      | Netherlands   | 1998                    | 2010                   | 7890               | 50 (12)                  | 3960 (50)   | 317 (4.0)          | 75 (1.0)                  | 381 (4.8)             | 12.7 (7.4 to 13.2)                                 | 795               | 221                   | 373           | 172                       | 77701        |
| PRHHP <sup>53</sup>        | Caribbean     | 1967                    | 1980                   | 6832               | 54 (6)                   | 6832 (100)  | 682 (10.0)         | 88 (1.3)                  | 398 (5.8)             | 12.0 (5.5 to 12.0)                                 | 1112              | 530                   | 263           | 294                       | 56492        |
| PRIME <sup>54</sup>        | France / NI   | 1992                    | 2000                   | 9998               | 55 (3)                   | 9998 (100)  | 344 (3.4)          | 73 (0.7)                  | 344 (3.4)             | 5.2 (5.0 to 7.3)                                   | 223               | 61                    | 106           | 39                        | 54563        |
| PROCAM <sup>55</sup>       | Germany       | 1983                    | 2003                   | 20484              | 44 (10)                  | 14861 (73)  | 433 (2.1)          | 61 (0.3)                  | 169 (0.8)             | 9.8 (3.8 to 18.9)                                  | 1071              | 351                   | 454           | 215                       | 241682       |
| PROSPER <sup>56</sup>      | Scotland/Irel | 1998                    | 2002                   | 4201               | 75 (3)                   | 1987 (47)   | 499 (11.9)         | 205 (4.9)                 | 776 (18.5)            | 3.3 (1.7 to 3.9)                                   | 430               | 200                   | 154           | 76                        | 12810        |
| ProspectEPI <sup>57</sup>  | Netherlands   | 1995                    | 2012                   | 16069              | 57 (6)                   | 0 (0)       | 339 (2.1)          | 310 (1.9)                 | 54 (0.3)              | 14.4 (9.5 to 17.2)                                 | 1329              | 324                   | 658           | 266                       | 221730       |
| QUEBEC <sup>58</sup>       | Canada        | 1974                    | 2002                   | 3415               | 46 (8)                   | 3415 (100)  | 63 (1.8)           | 8 (0.2)                   | 5 (0.1)               | 27.8 (11.1 to 28.2)                                | 993               | 188                   | 0             | 0                         | 74109        |
| RANCHO <sup>59</sup>       | USA           | 1985                    | 2002                   | 2188               | 70 (11)                  | 986 (45)    | 127 (5.8)          | 75 (3.4)                  | 303 (13.8)            | 14.2 (2.2 to 18.1)                                 | 1093              | 527                   | 241           | 320                       | 25273        |
| RS_ <sup>60</sup>          | Netherlands   | 1992                    | 2005                   | 5608               | 68 (8)                   | 2301 (41)   | 470 (8.4)          | 157 (2.8)                 | 753 (13.4)            | 12.0 (2.7 to 14.2)                                 | 2037              | 777                   | 570           | 447                       | 58177        |
| RS_II <sup>60</sup>        | Netherlands   | 2000                    | 2011                   | 2466               | 64 (8)                   | 1107 (45)   | 276 (11.2)         | 86 (3.5)                  | 117 (4.7)             | 10.0 (4.2 to 10.9)                                 | 392               | 127                   | 153           | 86                        | 23038        |
| RS_III <sup>60</sup>       | Netherlands   | 2007                    | 2011                   | 3429               | 57 (7)                   | 1472 (43)   | 268 (7.8)          | 35 (1.0)                  | 87 (2.5)              | 3.6 (1.9 to 4.8)                                   | 61                | 19                    | 34            | 6                         | 11888        |
| SHIHC <sup>51</sup>        | UK            | 1986                    | 1999                   | 13081              | 50 (7)                   | 6545 (50)   | 207 (1.6)          | 90 (0.7)                  | 2068 (15.8)           | 10.0 (7.6 to 10.0)                                 | 956               | 409                   | 380           | 143                       | 124751       |
| SHIP <sup>62</sup>         | Germany       | 1999                    | 2011                   | 3285               | 55 (14)                  | 1634 (50)   | 421 (12.8)         | 73 (2.2)                  | 121 (3.7)             | 11.3 (5.3 to 12.4)                                 | 507               | 178                   | 185           | 116                       | 21296        |
| SPEED <sup>8</sup>         | UK            | 1980                    | 1997                   | 2308               | 55 (4)                   | 2308 (100)  | 45 (1.9)           | 27 (1.2)                  | 132 (5.7)             | 16.8 (3.8 to 18.2)                                 | 674               | 347                   | 234           | 90                        | 32979        |
| TARFS <sup>64</sup>        | Turkey        | 1990                    | 2010                   | 3451               | 45 (13)                  | 1689 (49)   | 113 (3.3)          | 1 (0.0)                   | 4 (0.1)               | 20.0 (4.6 to 20.0)                                 | 550               | 301                   | 42            | 29                        | 44834        |
| TROMS <sup>12</sup>        | Norw ay       | 2002                    | 2009                   | 2017               | 51 (12)                  | 895 (44)    | 68 (3.4)           | 37 (1.8)                  | 62 (3.1)              | 7.5 (7.5 to 7.5)                                   | 91                | 33                    | 40            | 14                        | 14922        |
| TROMSØ <sup>65</sup>       | Norw ay       | 1987                    | 2009                   | 19917              | 43 (14)                  | 9868 (50)   | 229 (1.1)          | 175 (0.9)                 | 421 (2.1)             | 22.0 (10.2 to 22.4)                                | 2562              | 891                   | 830           | 554                       | 315667       |
| ULSAM <sup>66</sup>        | Sw eden       | 1972                    | 2008                   | 2038               | 51 (4)                   | 2038 (100)  | 120 (5.9)          | 6 (0.3)                   | 16 (0.8)              | 28.0 (8.7 to 37.7)                                 | 1369              | 616                   | 464           | 254                       | 49634        |
| WHIOS <sup>67</sup>        | USA           | 1994                    | 2012                   | 85493              | 63 (7)                   | 0 (0)       | 4326 (5.1)         | 1224 (1.4)                | 2260 (2.6)            | 12.1 (5.1 to 14.8)                                 | 10580             | 2764                  | 4124          | 2687                      | 931744       |
| WHITE <sup>68</sup>        | UK            | 1997                    | 2010                   | 4890               | 77 (5)                   | 4890 (100)  | 275 (5.6)          | 345 (7.1)                 | 607 (12.4)            | 11.0 (1.7 to 13.3)                                 | 2841              | 1177                  | 758           | 869                       | 46175        |
| ZUTE <sup>61</sup>         | Netherlands   | 1960                    | 2000                   | 641                | 64 (13)                  | 641 (100)   | 22 (3.4)           | 6 (0.9)                   | 32 (5.0)              | 25.0 (6.5 to 40.1)                                 | 429               | 189                   | 135           | 71                        | 13192        |
| TOTAL                      |               |                         |                        | 689300             | 53 (9)                   | 340930 (49) | 29772 (4.3)        | 12281 (1.8)               | 27201 (3.9)           | 12.8 (4.0 to 29.5)                                 | 128843            | 50595                 | 39266         | 30664                     | 8832963      |

\*All-cause mortality includes 8318 unknown or ill-defined deaths. Numbers of deaths are based on data without censoring for non-fatal outcomes. Superscripted numbers listed after the study acronyms refer to publications in the list of references in the Supplement.

**eTable 2.** Study-specific definition of known history of diabetes, myocardial infarction and stroke at baseline

| Study name              | Previous diabetes | Previous MI | Previous stroke | Study name                 | Previous diabetes | Previous MI | Previous stroke |
|-------------------------|-------------------|-------------|-----------------|----------------------------|-------------------|-------------|-----------------|
| ARIC <sup>1</sup>       | ○●                | ++          | +               | LEADER <sup>35</sup>       | ○                 | ++          | ++              |
| AUSDIAB <sup>3</sup>    | ○                 | +           | +               | MCVDRFP <sup>37</sup>      | ○                 | +           | +               |
| BHS <sup>4</sup>        | ○                 | ++          | +               | MDC <sup>38</sup>          | ○                 | ++          | ++              |
| BRHS <sup>5</sup>       | ○                 | ++          | ++              | MIDFAM <sup>39</sup>       | ○                 | ++          | ++              |
| BRUN <sup>6</sup>       | ○●●               | ++          | +               | MIDRP <sup>40</sup>        | ○                 | ++          | +               |
| BWHHS <sup>7</sup>      | ○                 | ++          | ++              | MONICA_KORA1 <sup>41</sup> | ○●                | +           | +               |
| CAPS <sup>8</sup>       | ○                 | ++          | +               | MONICA_KORA2 <sup>41</sup> | ○●                | +           | +               |
| CASTEL <sup>9</sup>     | ○                 | ++          | +               | MONICA_KORA3 <sup>41</sup> | ○●                | +           | +               |
| CHARL <sup>10</sup>     | ○                 | ++          | +               | MORGEN <sup>42</sup>       | ○                 | +           | +               |
| CHS <sup>a 11</sup>     | ○●                | ++          | +               | MOSWEGOT <sup>43</sup>     | ○                 | +           | +               |
| CONOR <sup>b 12</sup>   | ○                 | +           | +               | MPP <sup>36</sup>          | ○                 | +           | ++              |
| COPEN <sup>13</sup>     | ○                 | ++          | ++              | MRCOLD <sup>44</sup>       | ●                 | +           | +               |
| CUORE <sup>c 2</sup>    | ○●                | ++          | +               | MRFIT <sup>45</sup>        | ○                 | ++          | ++              |
| DESIR <sup>14</sup>     | ○●●               | ++          | ++              | NCS <sup>f 46</sup>        | ○                 | +           | +               |
| DUBBO <sup>16</sup>     | ○●                | ++          | +               | NHANESI <sup>47</sup>      | ○●                | +           | +               |
| EAS <sup>17</sup>       | ○                 | ++          | +               | NHANESIII <sup>48</sup>    | ○                 | +           | +               |
| EPESEBOS <sup>1</sup>   | ○                 | +           | +               | OSAKA <sup>50</sup>        | ●                 | ++          | +               |
| EPESEIOW <sup>1</sup>   | ○                 | +           | +               | OSLO <sup>51</sup>         | ○                 | +           | +               |
| EPESENCA <sup>1</sup>   | ○                 | +           | +               | PREVEND <sup>52</sup>      | ○●                | ++          | ++              |
| EPESENHA <sup>1</sup>   | ○                 | +           | +               | PRHHP <sup>53</sup>        | ○●                | ++          | ++              |
| EPICNOR <sup>19</sup>   | ○                 | +           | +               | PRIME <sup>54</sup>        | ○                 | ++          | +               |
| ESTHER <sup>20</sup>    | ○●                | ++          | +               | PROCAM <sup>55</sup>       | ○●                | ++          | +               |
| FINE <sup>d 21</sup>    | ○                 | ++          | ++              | ProspectEPIC <sup>57</sup> | ○                 | +           | +               |
| FINRISK <sup>e 22</sup> | ○●                | ++          | ++              | PROSPER <sup>56</sup>      | ○                 | ++          | ++              |
| FRAMOFF <sup>23</sup>   | ○●●               | ++          | ++              | QUEBEC <sup>58</sup>       | ○                 | ++          | ++              |
| GOTO13 <sup>24</sup>    | ○                 | ++          | ++              | RANCHO <sup>59</sup>       | ○●                | ++          | +               |
| GOTO33 <sup>24</sup>    | ○                 | ++          | ++              | RIFLE <sup>g 15</sup>      | ○                 | ++          | ++              |
| GOTO43 <sup>24</sup>    | ○                 | ++          | ++              | ROTT <sup>h 60</sup>       | ○●                | ++          | +               |
| GOTOW <sup>25</sup>     | ○●●               | ++          | ++              | SHHEC <sup>61</sup>        | ○                 | ++          | +               |
| GRIPS <sup>26</sup>     | ○                 | ++          | ++              | SHIP <sup>62</sup>         | ○●                | ++          | ++              |
| HCS <sup>27</sup>       | ○                 | ++          | ++              | SPEED <sup>8</sup>         | ○                 | ++          | +               |
| HIMS <sup>28</sup>      | ○                 | ++          | ++              | TARFS <sup>64</sup>        | ○●●               | ++          | ++              |
| HONOL <sup>29</sup>     | ○●●               | ++          | ++              | TROMSO <sup>65</sup>       | ○●                | +           | +               |
| HOORN <sup>30</sup>     | ○●●               | ++          | +               | ULSAM <sup>66</sup>        | ○●                | ++          | ++              |
| KIHD <sup>33</sup>      | ●                 | ++          | ++              | WHIOS <sup>67</sup>        | ○●                | +           | +               |
| LASA <sup>34</sup>      | ○●                | ++          | +               | WHITEI <sup>68</sup>       | ○●                | +           | +               |

○: Self-report only; ●: Diabetes medications data; ●: Biochemical criteria; +: Self-report only; ++: Self-report supplemented by objective criteria (eg, Electrocardiogram, Physical examination)

<sup>a</sup> CHS was analysed as 2 different studies (ie, CHS-1 and CHS-2).

<sup>b</sup> CONOR was analysed as 5 different studies (ie, FINNMARK, HUBRO, OPPHED, OSLO2, and TROMS).

<sup>c</sup> CUORE was analysed as 8 different studies (ie, ATENA, EMOFRI, MATISS-83, MATISS-87, MATISS-93, MONFRI-86, MONFRI-89 and MONFRI-94).

<sup>d</sup> FINE was analysed as 3 different studies (FINE\_FIN, FINE\_IT, and ZUTE). FINE\_IT ascertained baseline history of diabetes using self-report and diabetes medications data.

<sup>e</sup> FINRISK was analysed as 2 different studies (FINRISK92 and FINRISK97).

<sup>f</sup> NCS was analysed as 3 different studies (ie, NCS1, NCS2 and NCS3).

<sup>g</sup> RIFLE was analysed as 2 different studies (ie, DISCO and NFR).

<sup>h</sup> ROTT was analysed as 3 different studies (ie, RS\_I, RS\_II, RS\_III).

**eTable 3.** Hazard ratios for all-cause mortality according to participants' disease status at baseline in UK Biobank

| <i>Disease status at baseline</i> | <i>No. of participants</i> | <i>No. of deaths</i> | <i>Pearson-years</i> | <i>Hazard ratio (95% CI)</i> |
|-----------------------------------|----------------------------|----------------------|----------------------|------------------------------|
| Diabetes & Stroke & MI            | 230                        | 29                   | 1,039                | 6.0 (4.2, 8.7)               |
| Stroke & MI                       | 668                        | 57                   | 3,151                | 3.8 (2.9, 4.9)               |
| Diabetes & Stroke                 | 966                        | 79                   | 4,511                | 3.9 (3.1, 4.9)               |
| Diabetes & MI                     | 2,036                      | 201                  | 9,341                | 4.3 (3.7, 5.0)               |
| MI only                           | 8,770                      | 421                  | 41,717               | 2.1 (1.9, 2.3)               |
| Stroke only                       | 6,835                      | 277                  | 32,563               | 2.1 (1.9, 2.4)               |
| Diabetes only                     | 18,549                     | 534                  | 87,474               | 1.6 (1.5, 1.8)               |
| None                              | 461,754                    | 6,397                | 2,214,549            | [Reference]                  |

Hazard ratios are adjusted by age and sex.

**eTable 4.** Estimated future years of life lost according to participants' age, sex and disease status at baseline

| <i>Disease status at baseline</i> | <i>Age (years)</i> |      |      |      |      |      |     |     |     |     |
|-----------------------------------|--------------------|------|------|------|------|------|-----|-----|-----|-----|
|                                   | 40                 | 45   | 50   | 55   | 60   | 65   | 70  | 75  | 80  | 85  |
| <b>Male</b>                       |                    |      |      |      |      |      |     |     |     |     |
| Diabetes & Stroke & MI            | 22.9               | 21.7 | 19.8 | 17.3 | 14.4 | 11.2 | 8.1 | 5.2 | 2.9 | 1.2 |
| Stroke & MI                       | 21.5               | 20.1 | 18.1 | 15.6 | 12.9 | 10.1 | 7.4 | 4.8 | 2.7 | 1.2 |
| Diabetes & Stroke                 | 16.3               | 15.6 | 14.5 | 13.1 | 11.2 | 9.1  | 6.8 | 4.6 | 2.6 | 1.2 |
| Diabetes & MI                     | 16.8               | 16.0 | 14.8 | 13.1 | 11.2 | 9.0  | 6.7 | 4.5 | 2.6 | 1.2 |
| MI only                           | 10.0               | 9.6  | 8.9  | 8.0  | 7.0  | 5.7  | 4.4 | 3.1 | 1.9 | 0.9 |
| Stroke only                       | 8.8                | 8.6  | 8.1  | 7.5  | 6.6  | 5.6  | 4.4 | 3.1 | 1.9 | 0.9 |
| Diabetes only                     | 7.9                | 7.6  | 7.2  | 6.5  | 5.7  | 4.8  | 3.7 | 2.7 | 1.6 | 0.8 |
| <b>Female</b>                     |                    |      |      |      |      |      |     |     |     |     |
| Diabetes & Stroke & MI            | 20.1               | 19.8 | 19.1 | 17.7 | 15.7 | 13.0 | 9.9 | 6.7 | 3.9 | 1.8 |
| Stroke & MI                       | 13.0               | 12.8 | 12.3 | 11.5 | 10.4 | 9.0  | 7.2 | 5.2 | 3.3 | 1.6 |
| Diabetes & Stroke                 | 16.5               | 16.2 | 15.5 | 14.5 | 13.0 | 11.1 | 8.7 | 6.2 | 3.8 | 1.9 |
| Diabetes & MI                     | 19.9               | 19.2 | 18.1 | 16.4 | 14.3 | 11.8 | 9.1 | 6.4 | 3.8 | 1.8 |
| MI only                           | 6.5                | 6.4  | 6.2  | 5.9  | 5.5  | 4.9  | 4.1 | 3.1 | 2.0 | 1.0 |
| Stroke only                       | 7.4                | 7.4  | 7.2  | 7.0  | 6.5  | 5.9  | 5.0 | 3.8 | 2.5 | 1.3 |
| Diabetes only                     | 8.2                | 8.1  | 7.8  | 7.3  | 6.7  | 5.9  | 4.8 | 3.6 | 2.4 | 1.2 |

Estimates of cumulative survival from 40 years of age onwards among the eight baseline disease groups were calculated by applying hazard ratios (specific to age-at-risk and sex) for cause-specific mortality associated with baseline disease status to US cause-specific death rates at 40 years of age and older.

**eTable 5.** Summary of prospective studies included in the literature-based systematic review

| <i>Study acronym</i>        | <i>Country</i> | <i>Population source</i> | <i>Baseline year</i> | <i>Date of last follow-up</i> | <i>Age, range</i> | <i>Sex, % male</i> | <i>Exposed group</i> | <i>No. of participants, exposed / reference group</i> | <i>No. of deaths, exposed / reference group</i> |
|-----------------------------|----------------|--------------------------|----------------------|-------------------------------|-------------------|--------------------|----------------------|-------------------------------------------------------|-------------------------------------------------|
| EPESE <sup>23</sup>         | USA            | Population register      | 1993-1994            | 1999                          | 65+               | 43                 | Diabetes & Stroke    | 76 / 2,246                                            | 35 / 375                                        |
| Schramm et al. <sup>9</sup> | Denmark        | Data linkage             | 1997                 | 2002                          | 30+               | 48                 | Diabetes & MI        | 6,419 / 3,129,516                                     | 2,997 / 244,775                                 |
| PHS <sup>10</sup>           | USA            | Occupational             | 1982-1983            | 1988                          | 40-84             | 100                | Diabetes & CHD       | 815 / 82,247                                          | 210 / 2,425                                     |
| FINRISK <sup>11</sup>       | Finland        | Population register      | 1972-1997            | 2001                          | 25-74             | 49                 | Diabetes & MI        | 146 / 49,319                                          | 93 / 8,082                                      |
| HPFS <sup>12</sup>          | USA            | Occupational             | 1986                 | 1996                          | 40-75             | 100                | Diabetes & CHD       | 230 / 47,763                                          | 98 / 3,195                                      |
| NHS <sup>14</sup>           | USA            | Occupational             | 1976                 | 1996                          | 30-55             | 0                  | Diabetes & CHD       | 234 / 109,231                                         | 30 / 7,853                                      |

Abbreviations: CHD, coronary heart disease; EPESE, Hispanic Established Population for the Epidemiological Study of the Elderly; HPFS, Health Professionals Follow-up Study; MI, myocardial infarction; NHS, Nurses' Health Study; PHS, Physicians' Health Study. Superscripted numbers listed after the study acronyms refer to publications in the list of references in the main text.

eFigure 1. Study design

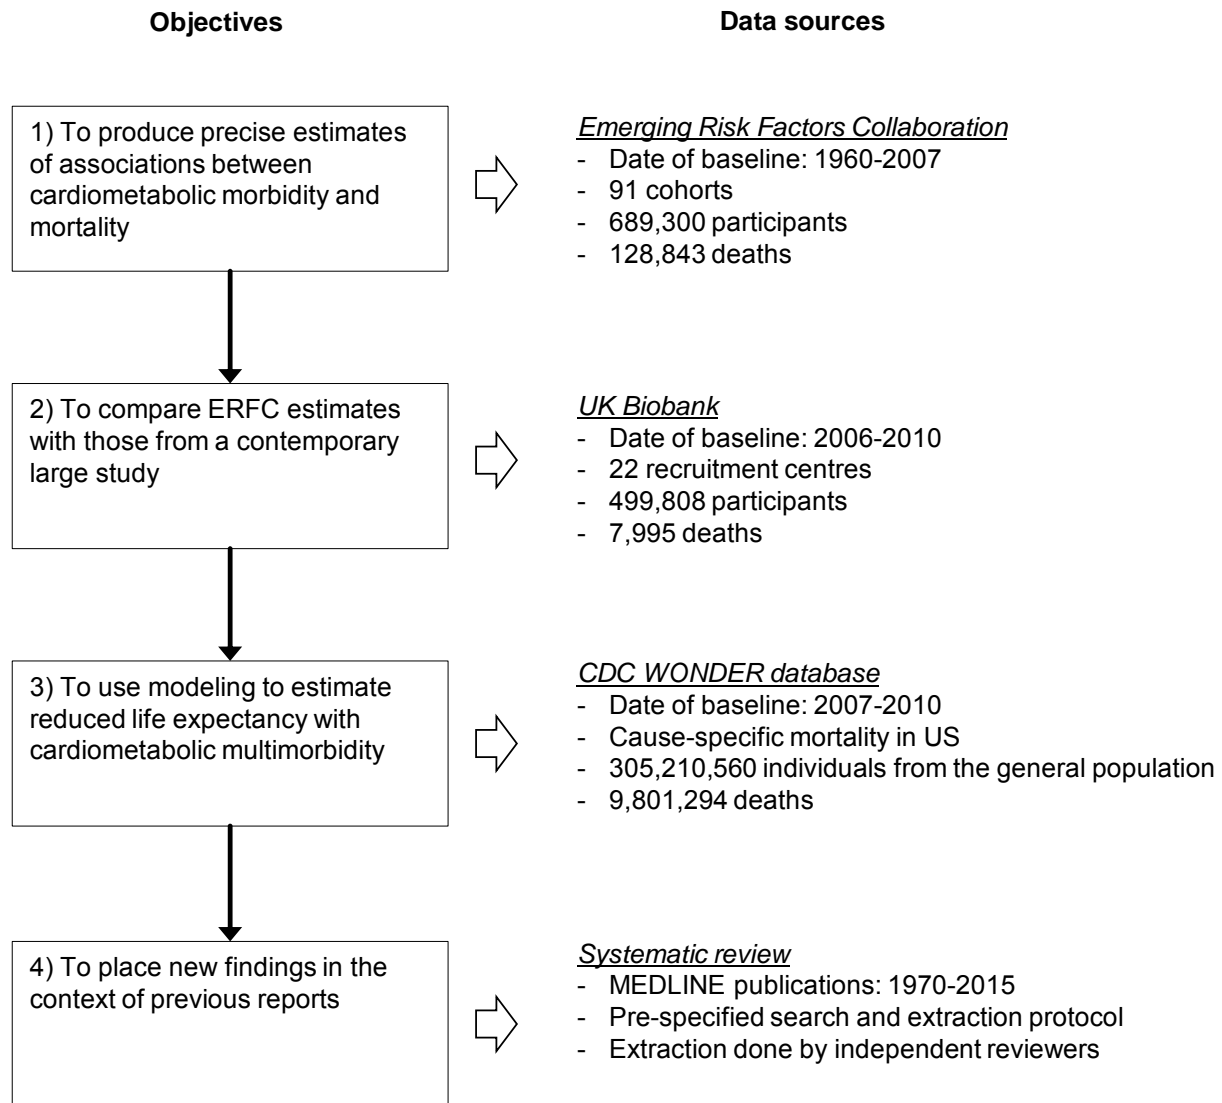



**eFigure 2.** Hazard ratios for all-cause mortality according to participants' disease status at baseline, against follow-up time

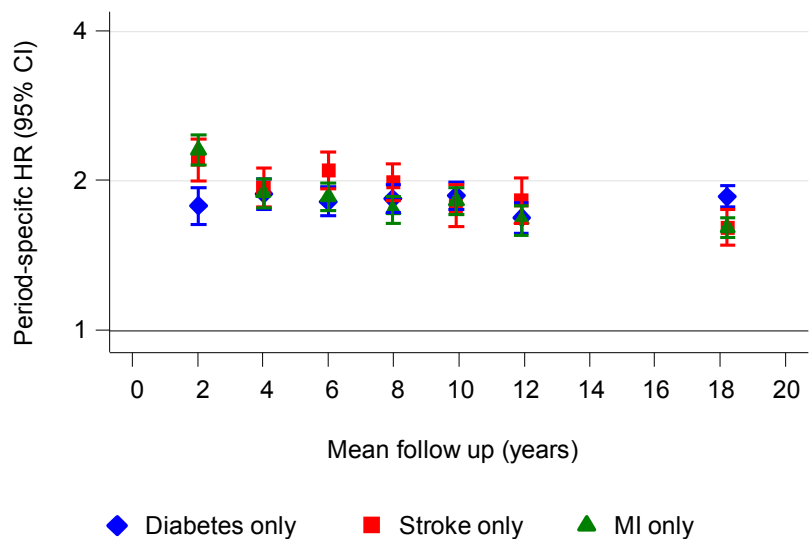

Hazard-ratios (HRs) were adjusted for age and sex. HRs were calculated within bins of follow-up times defined as 0 to <2, 2 to <4, 4 to <6, 6 to <8, 8 to <10, 10 to <12, and ≥12 years.

**eFigure 3.** Sex-specific hazard ratios for all-cause mortality according to participants' disease status at baseline

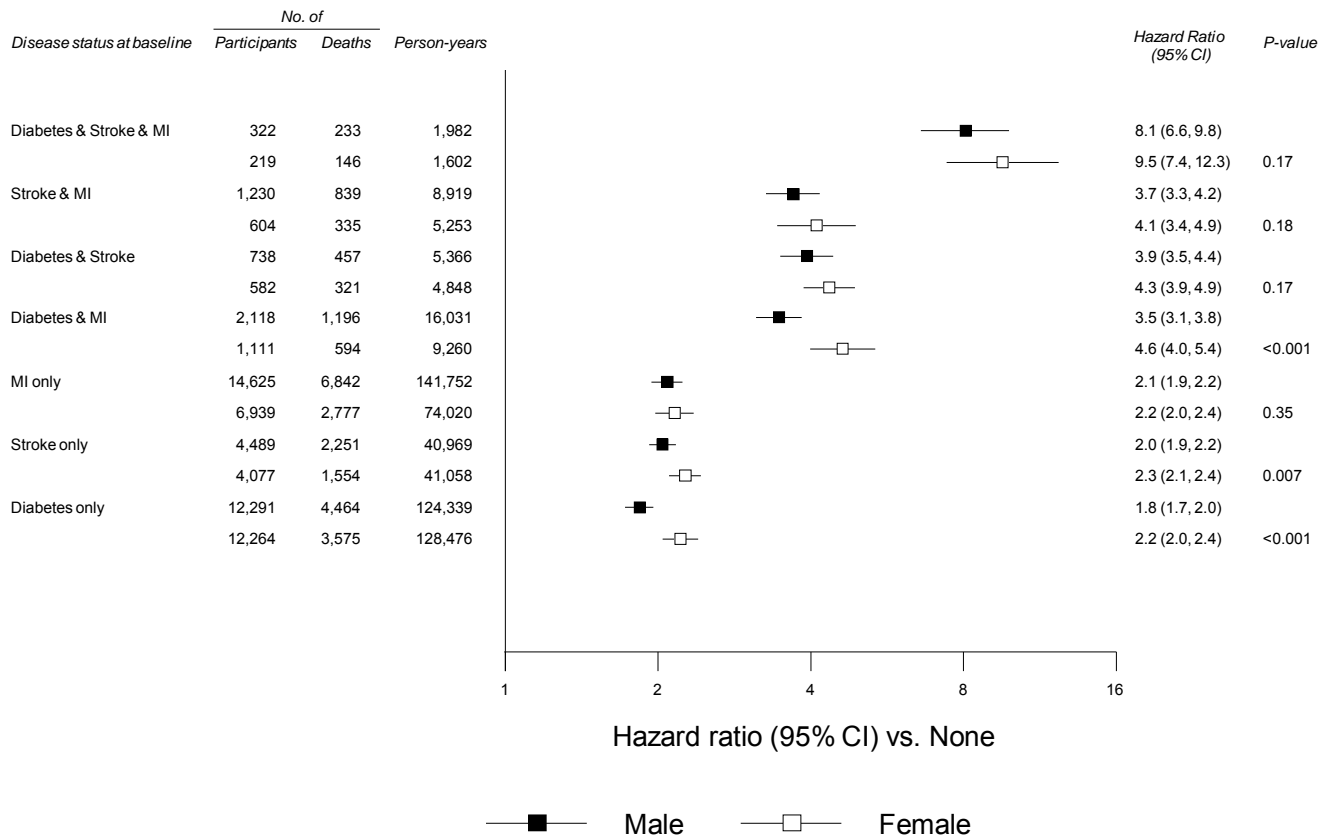

Hazard ratios are stratified by sex and adjusted by age at baseline. Analyses were based on data without censoring for non-fatal outcomes. Analyses were based on participants from 91 studies.

**eFigure 4.** Hazard ratios for cardiovascular mortality, cancer mortality, and nonvascular noncancer mortality according to participants' disease status at baseline

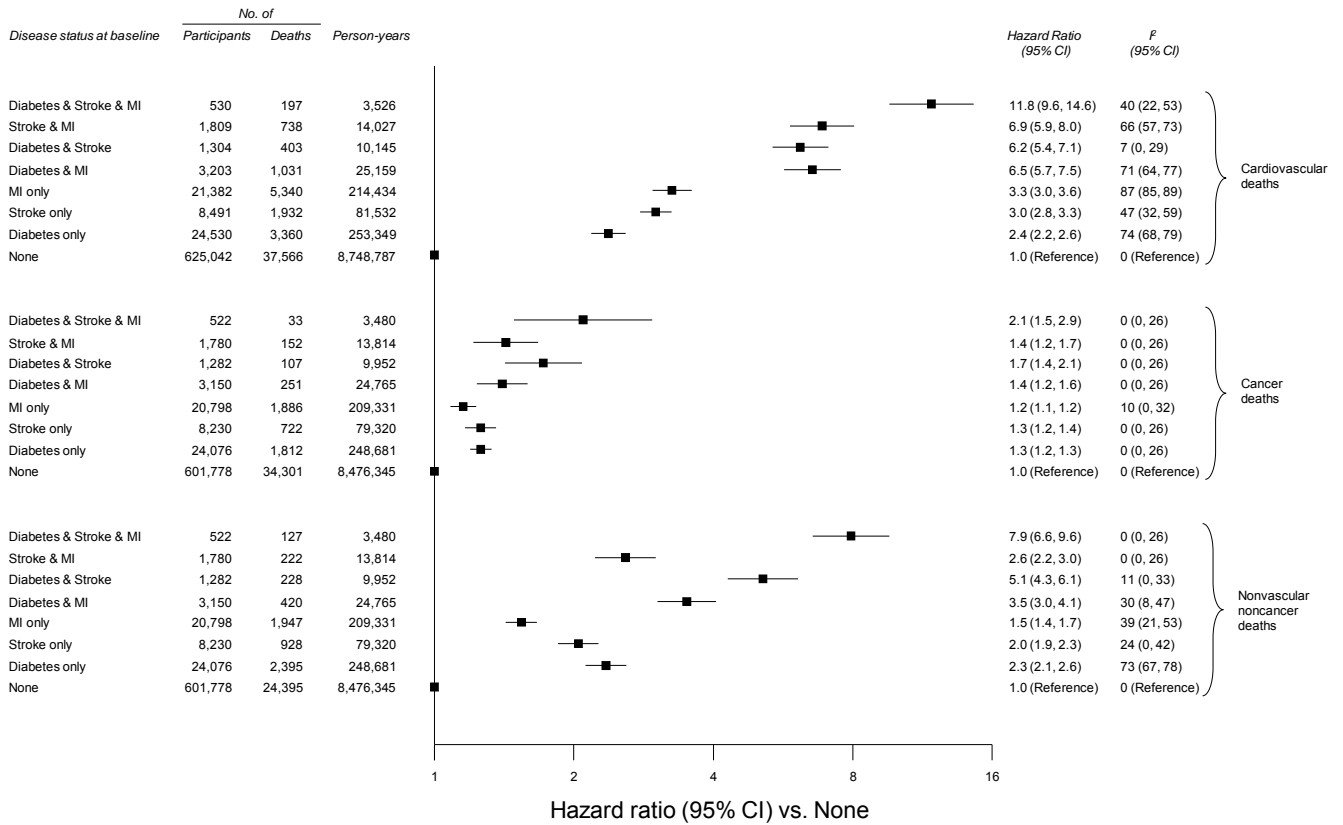

Hazard ratios are stratified by sex and adjusted by age at baseline. Analyses were based on data without censoring for non-fatal outcomes. Analyses were based on 89 studies for cardiovascular mortality, 87 studies for cancer mortality, and 87 studies for nonvascular noncancer mortality.

**eFigure 5.** Hazard ratios for all-cause mortality according to participants' disease status at baseline, by study-specific definitions of baseline diseases

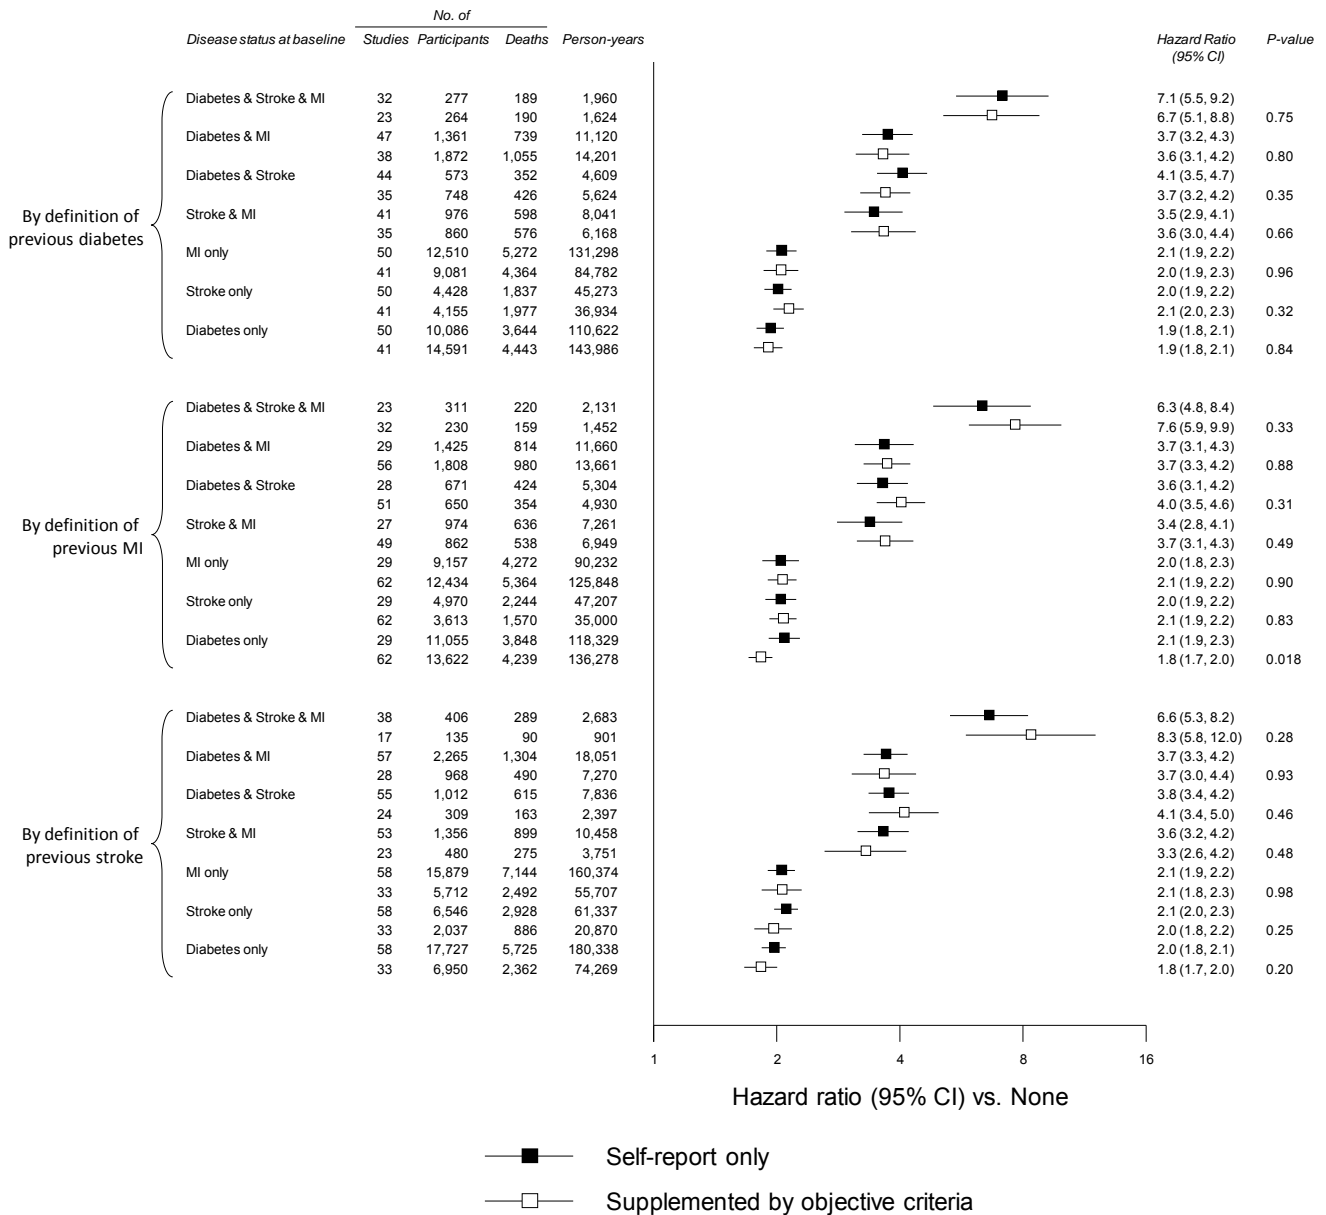

Hazard ratios are stratified by sex and adjusted by age at baseline. Study-specific definitions of baseline diseases are provided in eTable 2.

**eFigure 6.** Hazard ratios for all-cause mortality according to participants' disease status at baseline, by study-specific methods of ascertainment of death

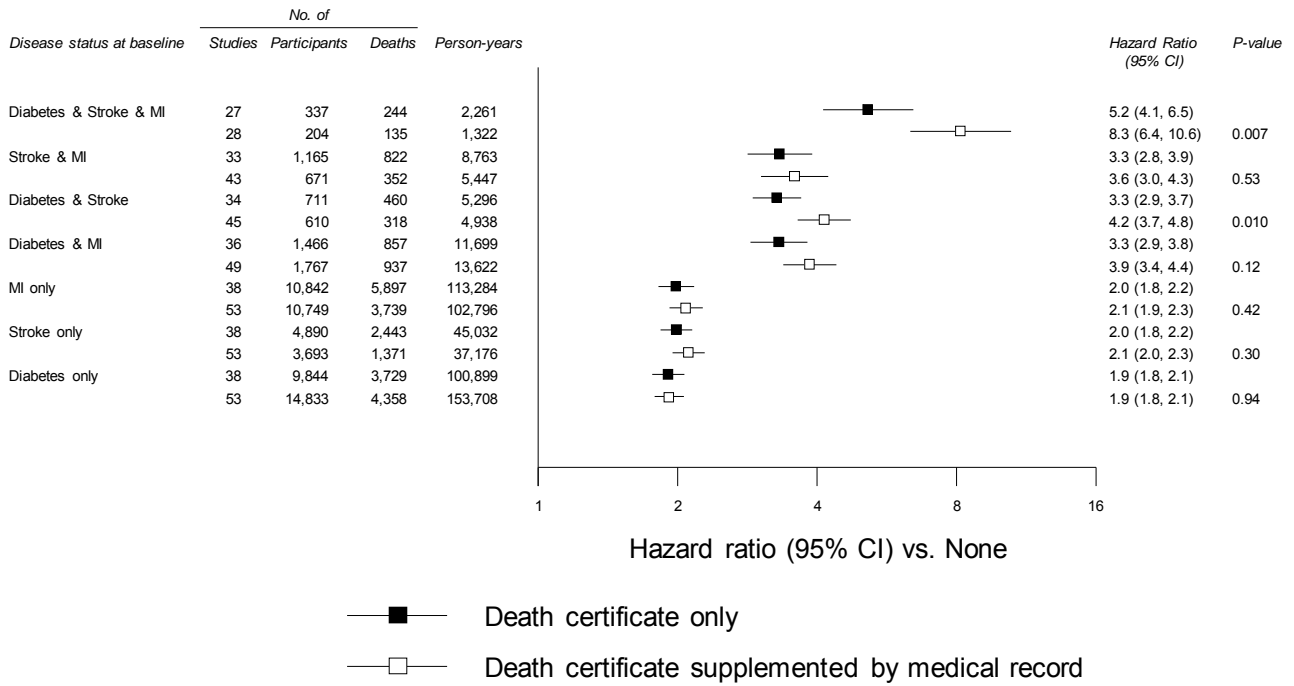

Hazard ratios are stratified by sex and adjusted by age at baseline.

**eFigure 7.** Hazard ratios for all-cause mortality according to participants' disease status at baseline, after excluding the first 5 years of follow-up

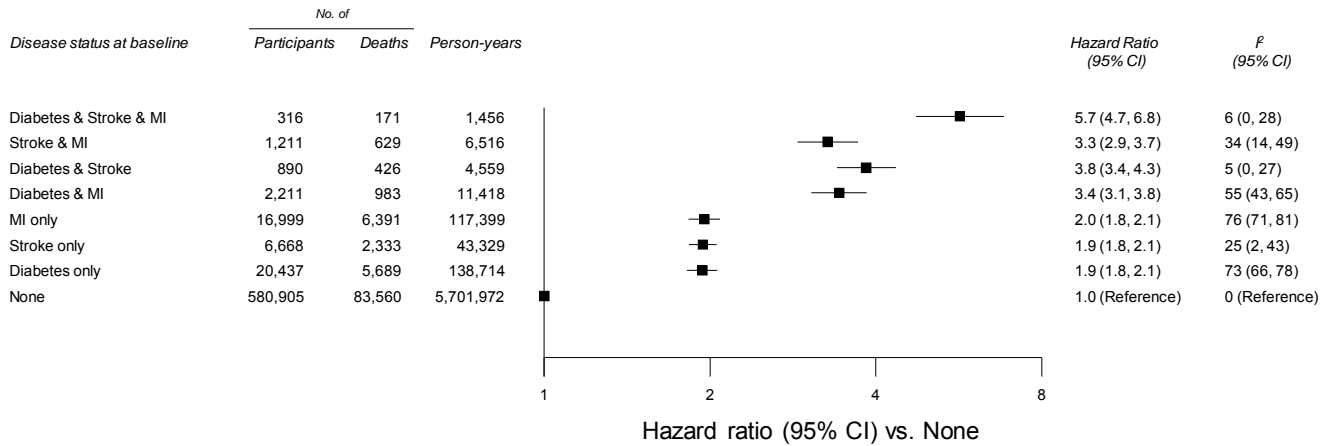

Hazard ratios are stratified by sex and adjusted by age at baseline. Analyses of all-cause mortality were based on data without censoring for non-fatal outcomes. Analyses were based on participants from 87 studies.

**eFigure 8.** Hazard ratios for all-cause mortality according to participants' disease status at baseline, with study-specific estimates pooled using fixed-effect meta-analysis.

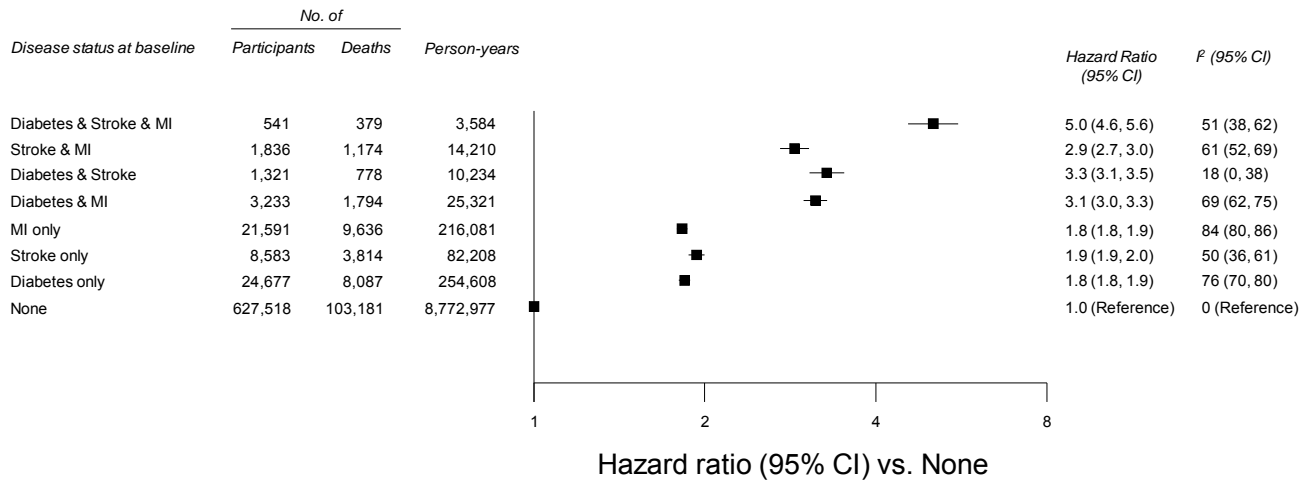

Hazard ratios are stratified by sex and adjusted by age at baseline. Analyses of all-cause mortality were based on data without censoring for non-fatal outcomes. Analyses were based on participants from 87 studies.

**eFigure 9A.** Hazard ratios for all-cause mortality according to participants' disease status at baseline and by median year of survey

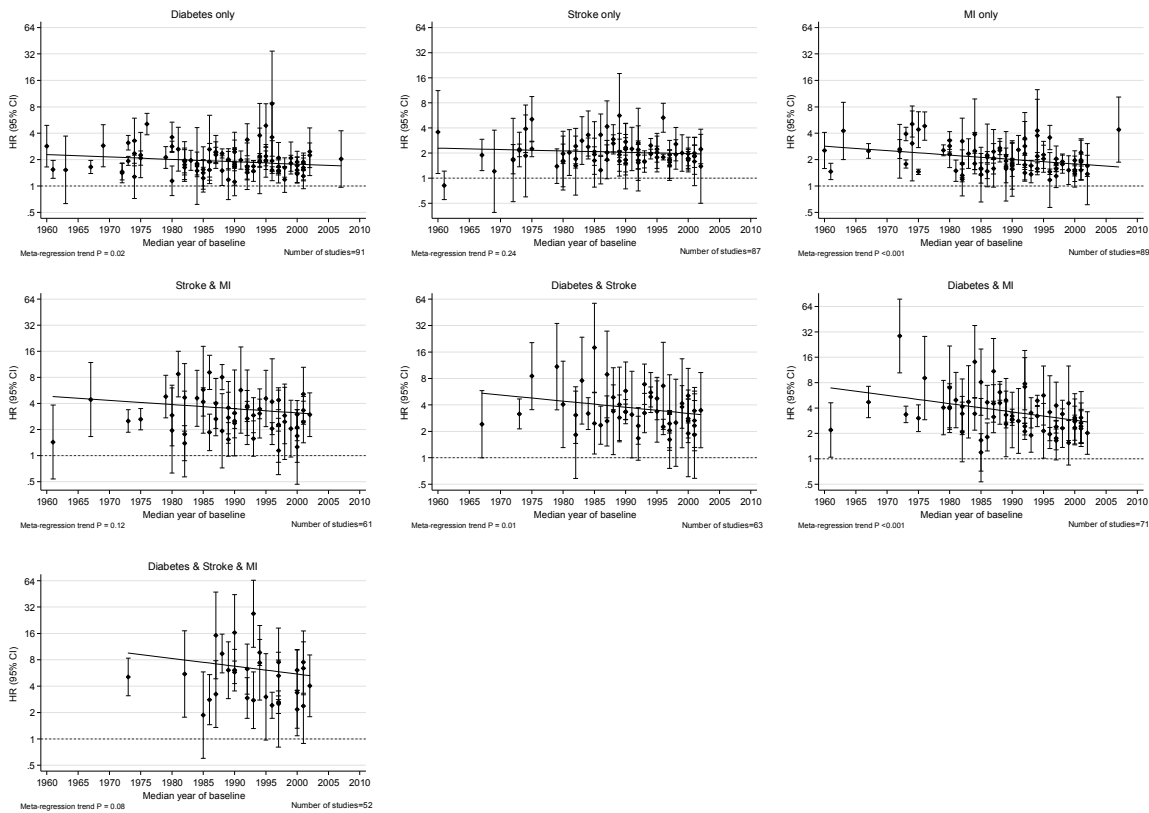

Hazard ratios (HRs) were stratified by sex and adjusted by age at baseline. Each data marker denotes results from a single study. The number of studies contributing to each panel in this figure is listed under the panel's horizontal axis. Studies with less than 2 events in each exposure category were omitted from the plots. To provide greater visual clarity in instances when more than one study in a panel had the same median year of survey, panels in Figure 9B have been plotted without confidence intervals around the point estimates. The lines in this figure have been fitted by meta-regression using a method described in reference 16 of the reference list in the main text.



**eFigure 9B.** Hazard ratios (without confidence intervals) for all-cause mortality according to participants' disease status at baseline and by median year of survey

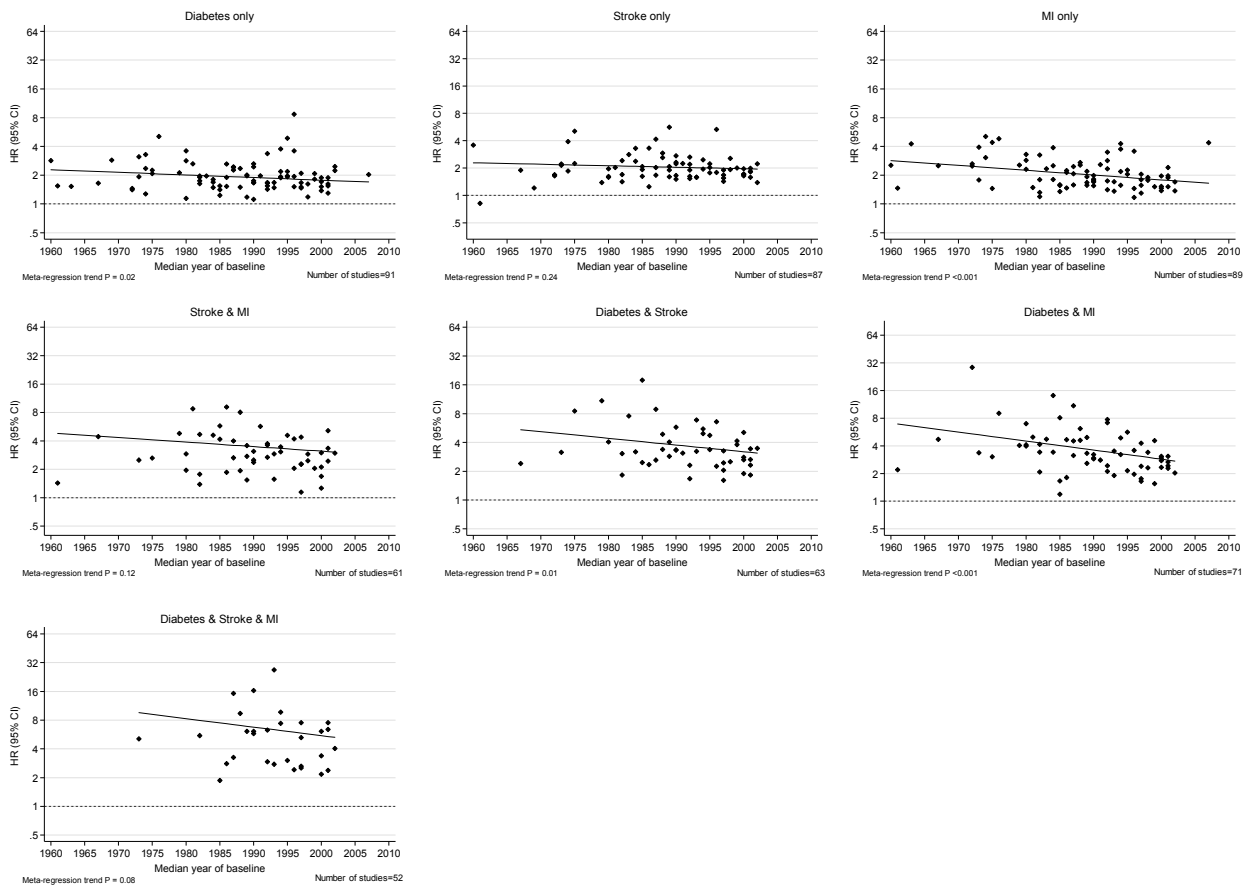

Hazard ratios (HRs) were stratified by sex and adjusted by age at baseline. Each data marker denotes results from a single study. The number of studies contributing to each panel in this figure is listed under the panel's horizontal axis. Studies with less than 2 events in each group were omitted from the plots. The lines in this figure have been fitted by meta-regression using a method described in reference 16 of the reference list in the main text.

**eFigure 10.** Estimated future years of life lost due to comorbidity with diabetes and prior MI or stroke, attributable to vascular, cancer and other mortality causes

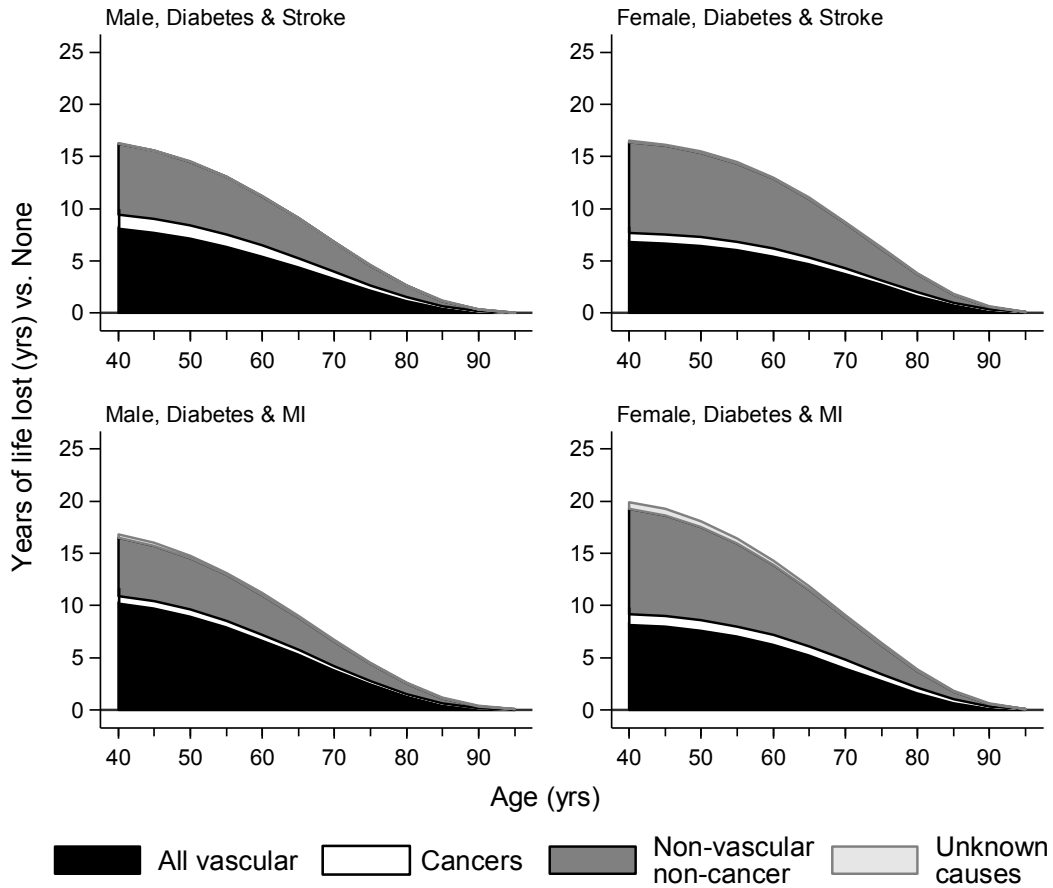

**eFigure 11.** Estimated future years of life lost according to diabetes, MI and stroke status in the European Union

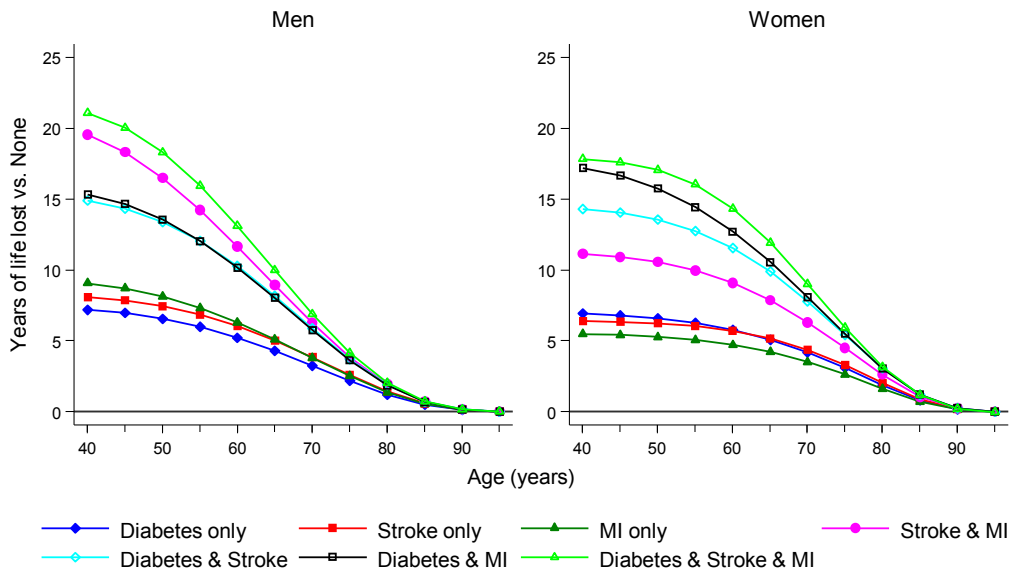

Estimates of cumulative survival from 40 years of age onwards among the eight baseline disease groups were calculated by applying hazard ratios (specific to age-at-risk and sex) for cause-specific mortality associated with baseline disease status to European Union cause-specific death rates at 40 years of age and older. Details are provided in eAppendix 5.

## eAppendix 1. Investigators of the Emerging Risk Factors Collaboration

**ARIC:** Eric A Whitsel, Lisa Miller Wruck, Elizabeth Selvin, Wayne D Rosamond; **AUSDIAB:** Jonathan E Shaw, Paul Z Zimmet, Elizabeth L M Barr; **BHS:** Matthew W Knuiman, Mark Divitini; **BRHS:** Peter H Whincup, S Goya Wannamethee, Richard W Morris; **BRUN:** Stefan Kiechl, Johann Willeit, Siegfried Weger, Arno Gasperi; **BWHHS:** Debbie A Lawlor, Shah Ebrahim; **CaPs:** John Gallacher, Yoav Ben-Shlomo, John W G Yarnell; **CASTEL:** Edoardo Casiglia; **CHARL:** Paul J Nietert, Susan E Sutherland, David L Bachman; **CHS:** Mary Cushman, Bruce M Psaty, Richard A Kronmal, (see <http://www.chs-nhlbi.org> for acknowledgements); **CONOR:** Randi Selmer, Anne J Sjøgaard, Lise L Håheim; **COPEN:** Børge G Nordestgaard, Anne Tybjaerg-Hansen, Ruth Frikke-Schmidt, Gorm B Jensen; **CUORE:** Simona Giampaoli, Salvatore Panico, Diego Vanuzzo, Luigi Palmieri; **DESIR:** Ronan Roussel, Fabrice Bonnet, Stephane Cauchi, Frédéric Fumeron; **DUBBO:** Leon A Simons, Judith Simons; **EAS:** Jackie F Price, Stela McLachlan, Amanda Lee; **EPESEBOS:** Caroline L Phillips, Jack M Guralnik, James O Taylor; **EPESEIOW:** Robert B Wallace, Frank Kohout, Jack M Guralnik; **EPESENCA:** Caroline L Phillips, Jack M Guralnik, Dan G Blazer; **EPESENHA:** Caroline L Phillips, Jack M Guralnik, Joanne M McGloin; **EPICNOR:** Kay-Tee Khaw, Nicholas J Wareham; **ESTHER:** Hermann Brenner, Ben Schöttker, Kai-Uwe Saum, Dietrich Rothenbacher; **FINE\_FIN:** Aulikki Nissinen; **FINE\_IT:** Chiara Donfrancesco, Simona Giampaoli; **FINRISK92, FINRISK97:** Veikko Salomaa, Erkki Vartiainen, Pekka Jousilahti, Kennet Harald; **FRAMOFF:** Ralph B D'Agostino, Sr., Joseph M. Massaro, Vasan S Ramachandran; **GOTO13:** Kurt Svärdsudd, Henry Eriksson, Georgios Lappas, Catharina Welin; **GOTO33:** Annika Rosengren, Henry Eriksson, Georgios Lappas, Catharina Welin; **GOTO43:** Lennart Welin, Henry Eriksson, Georgios Lappas, Catharina Welin; **GOTOW:** Cecilia Björkelund; **GRIPS:** Dorothea Nagel; **HCS:** Cyrus Cooper, Elaine M Dennison; **HIMS:** Leon Flicker, Graeme J Hankey, Paul E Norman, Osvaldo P Almeida, Jon Golledge; **HONOL:** Beatriz Rodriguez; **HOORN:** Coen D A Stehouwer, Jacqueline M Dekker, Giel Nijpels; **HPFS:** Frank B Hu; **IKNS:** Shinichi Sato; **KIHD:** Jussi Kauhanen, Jukka T Salonen, Tomi-Pekka Tuomainen, Sudhir Kurl, Sari Voutilainen; **LASA:** Dorly J H Deeg, Jan L Poppelaars, Renate T de Jongh; **LEADER:** Tom W Meade; **MCVDRFP:** W M Monique Verschuren; **MDC:** Bo Hedblad, Olle Melander; **MIDSPAN:** Carole L Hart, Naveed Sattar, Alex McConnachie, Graham Watt; **MONICA/KORA1,2,3:** Annette Peters, Christa Meisinger, Barbara Thorand, Wolfgang Koenig; **MORGEN:** W M Monique Verschuren; **MOSWEGOT:** Lars Wilhelmsen, Henry Eriksson, Georgios Lappas, Catharina Welin; **MPP:** Gunnar Engström, Peter M Nilsson; **MRCOLD:** Dorothea Nitsch, Chris Bulpitt; **MRFIT:** Lewis H Kuller, Greg Grandits; **NCS:** Randi Selmer, Sidsel Graff-Iversen; **NHANESI, NHANESIII:** Richard F Gillum; **NSHS:** Karina W Davidson, Jonathan A Shaffer; **OSAKA:** Hiroyasu Iso, Shinichi Sato; **Oslo:** Randi Selmer, Sidsel Graff-Iversen, Lise L Håheim; **PREVEND:** Pim van der Harst, Stephan J L Bakker, Hans L Hillege, Ron T Gansevoort; **PRHHP:** Carlos J Crespo; **PRIME:** Philippe Amouyel, Jean Dallongeville; **PROCAM:** Gerd Assmann, Helmut Schulte; **ProspectEPIC:** Yvonne T van der Schouw, Joline W J Beulens; **PROSPER:** J Wouter Jukema, Ian Ford, David J Stott; **QUEBEC:** Gilles R Dagenais, Bernard Cantin, Jean-Pierre Després, Benoît Lamarche; **RANCHO:** Elizabeth Barrett-Connor, Alka M Kanaya, Kimbach T Carpiuc, Assiamira Ferrara; **RIFLE:** Maurizio Trevisan; **RS-I:** Oscar H Franco, Albert Hofman, Frank JA van Rooij, M Arfan Ikram; **RS-II:** Maryam Kavousi, Abbas Dehghan, Jan Heeringa, Jessica C Kieft-de Jong; **RS-III:** Maarten JG Leening, Symen Ligthart, Janine F Felix, Loes Jaspers; **SHHEC:** Hugh Tunstall-Pedoe, Mark Woodward; **SHIP:** Marcus Dörr, Stephan B Felix, Roberto Lorbeer, Henry Völzke; **SHS:** Barbara V Howard, Lyle Best; **Speedwell:** Yoav Ben-Shlomo; **TARFS:** Altan Onat; **TROMSØ:** Inger Njølstad; **ULSAM:** Johan Sundström, Johan Ärnlöv, Lars Lind, Erik Ingelsson; **WHIOS:** Sylvia Wassertheil-Smoller; **WHITEI:** Michael Marmot, Astrid Fletcher, Eric J Brunner; **ZUTE:** Daan Kromhout;

**Data Management Team:** M Walker, S Spackman, T Bolton.

**Coordinating Centre:** T Bolton, N Bansal, S Burgess, A S Butterworth, E Di Angelantonio, D F Freitag, P Gao, E Harshfield, S Kaptoge, L M O'Keefe, L Pennells, S Spackman, S G Thompson, M Walker, P Willeit, A M Wood, D Wormser, J Danesh (principal investigator).

© 2015 American Medical Association. All rights reserved.

## eAppendix 2. List of study acronyms

**ARIC**, Atherosclerosis Risk in Communities Study<sup>1</sup>  
**ATENA**, cohort of Progetto CUORE<sup>2</sup>  
**AUSDIAB**, Australian Diabetes, Obesity and Lifestyle Study<sup>3</sup>  
**BHS**, Busselton Health Study<sup>4</sup>  
**BRHS**, British Regional Heart Study<sup>5</sup>  
**BRUN**, Bruneck Study<sup>6</sup>  
**BWHHS**, British Women's Heart and Health Study<sup>7</sup>  
**CaPS**, Caerphilly Prospective Study<sup>8</sup>  
**CASTEL**, Cardiovascular Study in the Elderly<sup>9</sup>  
**CHARL**, Charleston Heart Study<sup>10</sup>  
**CHS**, CHS-1 original cohort of the Cardiovascular Health Study<sup>11</sup> and CHS-2, supplemental African-American cohort of the Cardiovascular Health Study<sup>11</sup>  
**CONOR**, Cohort of Norway<sup>12</sup>  
**COPEN**, Copenhagen City Heart Study<sup>13</sup>  
**CUORE**, Progetto CUORE<sup>2</sup>  
**DESIR**, Data from an Epidemiological Study on the Insulin Resistance Syndrome<sup>14</sup>  
**DISCO**, cohort of Risk Factors and Life Expectancy Pooling Project<sup>15</sup>  
**DUBBO**, Dubbo Study of the Elderly<sup>16</sup>  
**EAS**, Edinburgh Artery Study<sup>17</sup>  
**EMOFRI**, part of CUORE<sup>2</sup>  
**EPESEBOS**, The Established Populations for the Epidemiologic Study of the Elderly Studies, Boston<sup>18</sup>  
**EPESEIOW**, The Established Populations for the Epidemiologic Study of the Elderly Studies, Iowa<sup>18</sup>  
**EPESENC**, The Established Populations for the Epidemiologic Study of the Elderly Studies, North Carolina<sup>18</sup>  
**EPESENH**, The Established Populations for the Epidemiologic Study of the Elderly Studies, New Haven<sup>18</sup>  
**EPICNOR**, European Prospective Investigation of Cancer Norfolk Study<sup>19</sup>  
**ESTHER**, Epidemiologische Studie zu Chancen der Verhütung und optimierten Therapie chronischer Erkrankungen in der älteren Bevölkerung<sup>20</sup>  
**FINE**, Finland, Italy and Netherlands Elderly Study – Italian cohort<sup>21</sup>  
**FINE\_FIN**, cohort of FINE<sup>21</sup>  
**FINE\_IT**, cohort of FINE<sup>21</sup>  
**FINMARK**, cohort of CONOR<sup>12</sup>  
**FINRISK-92**, Finrisk Cohort 1992<sup>22</sup>  
**FINRISK-97**, Finrisk Cohort 1997<sup>22</sup>  
**FRAMOFF**, Framingham Offspring Cohort<sup>23</sup>  
**GOTO13**, Goteborg Study 1913<sup>24</sup>  
**GOTO33**, Göteborg 1933 Study<sup>24</sup>  
**GOTO43**, Göteborg 1943 Study<sup>24</sup>  
**GOTOW**, Population Study of Women in Göteborg, Sweden<sup>25</sup>  
**GRIPS**, Göttingen Risk Incidence and Prevalence Study<sup>26</sup>  
**HCS**, Hertfordshire Cohort Study<sup>27</sup>  
**HIMS**, Health in Men Study<sup>28</sup>  
**HONOL**, Honolulu Heart Program<sup>29</sup>  
**HOORN**, Hoorn Study<sup>30</sup>  
**HPFS**, Health Professionals Follow-up Study<sup>31</sup>  
**HUBRO**, cohort of CONOR<sup>12</sup>  
**IKNS**, Ikawa, Kyowa, and Noichi Study<sup>32</sup>  
**KIHD**, Kuopio Ischaemic Heart Disease Study<sup>33</sup>  
**LASA**, Longitudinal Aging Study Amsterdam<sup>34</sup>  
**LEADER**, Lower Extremity Arterial Disease Event Reduction Trial<sup>35</sup>  
**MATISS-83**, cohort of Progetto CUORE<sup>2</sup>  
**MATISS-87**, cohort of Progetto CUORE<sup>2</sup>  
**MATISS-93**, cohort of Progetto CUORE<sup>2</sup>  
**MCVDRFP**, Monitoring of CVD Risk Factors Project<sup>37</sup>  
**MDC-CV**, Malmö Diet and Cancer Study<sup>38</sup>  
**MIDFAM**, MIDSPAN Family Study<sup>39</sup>  
**MIDRP**, MIDSPAN Renfrew & Paisley Study<sup>40</sup>  
**MONFRI-86**, cohort of Progetto CUORE<sup>2</sup>  
**MONFRI-89**, cohort of Progetto CUORE<sup>2</sup>  
**MONFRI-94**, cohort of Progetto CUORE<sup>2</sup>  
**MONICA\_KORA1**, MONICA/KORA Augsburg Surveys S1<sup>41</sup>  
**MONICA\_KORA2**, MONICA/KORA Augsburg Surveys S2<sup>41</sup>  
**MONICA\_KORA3**, MONICA/KORA Augsburg Surveys S3<sup>41</sup>  
**MORGEN**, Monitoring Project on Chronic Disease Risk Factors<sup>42</sup>  
**MOSWEGOT**, MONICA Göteborg Study<sup>43</sup>  
**MPP**, Malmö Preventive Project<sup>36</sup>  
**MRCOLD**, MRC Study of Older People<sup>44</sup>  
**MRFIT**, Multiple Risk Factor Intervention Trial 1<sup>45</sup>  
**NCS 1, 2 and 3**, Norwegian Counties Studies<sup>46</sup>  
**NFR**, cohort of Risk Factors and Life Expectancy Pooling Project<sup>15</sup>  
**NHANES I**, First National Health and Nutrition Examination Survey<sup>47</sup>  
**NHANES III**, Third National Health and Nutrition Examination Survey<sup>48</sup>  
**NSHS**, Nova Scotia Health Survey<sup>49</sup>

© 2015 American Medical Association. All rights reserved.

**OPPHED**, cohort of CONOR<sup>12</sup>  
**OSAKA**, Osaka Study<sup>50</sup>  
**OSLO**, Oslo Study<sup>51</sup>  
**OSLO2**, cohort of CONOR<sup>12</sup>  
**PREVEND**, Prevention of Renal and Vascular End Stage Disease Study<sup>52</sup>  
**PRHHP**, Puerto Rico Heart Health Program<sup>53</sup>  
**PRIME**, Prospective Epidemiological Study of Myocardial Infarction<sup>54</sup>  
**PROCAM**, Prospective Cardiovascular Münster Study<sup>55</sup>  
**Prospect EPIC**, Prospect-EPIC Utrecht<sup>57</sup>  
**PROSPER**, Prospective Study of Pravastatin in the Elderly at Risk<sup>56</sup>  
**QUEBEC**, Quebec Cardiovascular Study<sup>58</sup>  
**RANCHO**, Rancho Bernardo Study<sup>59</sup>  
**RIFLE**, Risk Factors and Life Expectancy Pooling Project<sup>15</sup>  
**ROTT**, The Rotterdam Study<sup>60</sup>  
**RS-1, 2 and 3**, cohorts of The Rotterdam Study<sup>60</sup>  
**SHHEC**, Scottish Heart Health Extended Cohort<sup>61</sup>  
**SHIP**, Study of Health in Pomerani<sup>62</sup>  
**SHS**, Strong Heart Study<sup>63</sup>  
**SPEED**, Speedwell Study<sup>8</sup>  
**TARFS**, Turkish Adult Risk Factor Study<sup>64</sup>  
**TROMS**, cohort of CONOR<sup>12</sup>  
**TROMSØ**, Tromsø Study<sup>65</sup>  
**ULSAM**, Uppsala Longitudinal Study of Adult Men<sup>66</sup>  
**WHIOS**, Women's Health Initiative<sup>67</sup>  
**WHITE I**, Whitehall I Study<sup>68</sup>  
**ZUTE**, cohort of FINE<sup>21</sup>

## References

- (1) Lee CD, Folsom AR, Pankow JS, Brancati FL. Cardiovascular events in diabetic and nondiabetic adults with or without history of myocardial infarction. *Circulation* 2004;109:855-860.
- (2) Palmieri L, Donfrancesco C, Giampaoli S et al. Favorable cardiovascular risk profile and 10-year coronary heart disease incidence in women and men: results from the Progetto CUORE. *Eur J Cardiovasc Prev Rehabil* 2006;13:562-570.
- (3) Dunstan DW, Zimmet PZ, Welborn TA et al. The Australian Diabetes, Obesity and Lifestyle Study (AusDiab)-- methods and response rates. *Diabetes Res Clin Pract* 2002;57:119-129.
- (4) Knuiiman MW, Vu HT. Prediction of coronary heart disease mortality in Busselton, Western Australia: an evaluation of the Framingham, national health epidemiologic follow up study, and WHO ERICA risk scores. *J Epidemiol Community Health* 1997;51:515-519.
- (5) Wannamethee SG, Shaper AG, Lennon L. Cardiovascular disease incidence and mortality in older men with diabetes and in men with coronary heart disease. *Heart* 2004;90:1398-1403.
- (6) Willeit J, Kiechl S. Prevalence and risk factors of asymptomatic extracranial carotid artery atherosclerosis. A population-based study. *Arterioscler Thromb* 1993;13:661-668.
- (7) Lawlor DA, Bedford C, Taylor M, Ebrahim S. Geographical variation in cardiovascular disease, risk factors, and their control in older women: British Women's Heart and Health Study. *J Epidemiol Community Health* 2003;57:134-140.
- (8) Bainton D, Miller NE, Bolton CH et al. Plasma triglyceride and high density lipoprotein cholesterol as predictors of ischaemic heart disease in British men. The Caerphilly and Speedwell Collaborative Heart Disease Studies. *Br Heart J* 1992;68:60-66.
- (9) Casiglia E, Pauletto P, Mazza A et al. Impaired glucose tolerance and its co-variables among 2079 non-diabetic elderly subjects. Ten-year mortality and morbidity in the CASTEL study. Cardiovascular Study in the ELderly. *Acta Diabetol* 1996;33:284-290.
- (10) Nietert PJ, Sutherland SE, Keil JE, Bachman DL. Demographic and biologic influences on survival in whites and blacks: 40 years of follow-up in the Charleston Heart Study. *Int J Equity Health* 2006;5:8.
- (11) Carnethon MR, Biggs ML, Barzilay J et al. Diabetes and coronary heart disease as risk factors for mortality in older adults. *Am J Med* 2010;123:556-559.
- (12) Rabanal KS, Lindman AS, Selmer RM, Aamodt G. Ethnic differences in risk factors and total risk of cardiovascular disease based on the Norwegian CONOR study. *Eur J Prev Cardiol* 2012.
- (13) Schnohr P, Jensen G, Nyboe J, Eybjaerg HA. [The Copenhagen City Heart Study. A prospective cardiovascular population study of 20,000 men and women]. *Ugeskr Laeger* 1977;139:1921-1923.
- (14) Balkau B, Lange C, Fezeu L et al. Predicting diabetes: clinical, biological, and genetic approaches: data from the Epidemiological Study on the Insulin Resistance Syndrome (DESIR). *Diabetes Care* 2008;31:2056-2061.
- (15) The RIFLE Research Group. Presentation of the rifle project risk factors and life expectancy. The RIFLE Research Group. *Eur J Epidemiol* 1993;9:459-476.
- (16) Simons LA, Simons J, Friedlander Y, McCallum J. Usefulness of fasting plasma glucose to predict mortality or coronary heart disease in persons > or = 60 years of age without diabetes mellitus or in those with undiagnosed diabetes mellitus (from The Dubbo Study). *Am J Cardiol* 2008;102:831-834.
- (17) Fowkes FG, Housley E, Cawood EH, Macintyre CC, Ruckley CV, Prescott RJ. Edinburgh Artery Study: prevalence of asymptomatic and symptomatic peripheral arterial disease in the general population. *Int J Epidemiol* 1991;20:384-392.
- (18) Cornoni-Huntley J, Ostfeld AM, Taylor JO et al. Established populations for epidemiologic studies of the elderly: study design and methodology. *Aging (Milano)* 1993;5:27-37.
- (19) Day N, Oakes S, Luben R et al. EPIC-Norfolk: study design and characteristics of the cohort. European Prospective Investigation of Cancer. *Br J Cancer* 1999;80 Suppl 1:95-103.

- (20) Schöttker B, Haug U, Schomburg L, Köhrle J, Perna L, Müller H, Holleczer B, Brenner H. Strong associations of 25-hydroxyvitamin D concentrations with all-cause, cardiovascular, cancer, and respiratory disease mortality in a large cohort study. *Am J Clin Nutr* 2013;97:782-793.
- (21) Menotti A, Mulder I, Nissinen A et al. Cardiovascular risk factors and 10-year all-cause mortality in elderly European male populations; the FINE study. Finland, Italy, Netherlands, Elderly. *Eur Heart J* 2001;22:573-579.
- (22) Laatikainen T, Critchley J, Vartiainen E, Salomaa V, Ketonen M, Capewell S. Explaining the decline in coronary heart disease mortality in Finland between 1982 and 1997. *Am J Epidemiol* 2005;162:764-773.
- (23) Rutter MK, Meigs JB, Sullivan LM, D'Agostino RB Sr, Wilson PW. C-reactive protein, the metabolic syndrome, and prediction of cardiovascular events in the Framingham Offspring Study. *Circulation* 2004;110:380-385.
- (24) Rosengren A, Eriksson H, Larsson B et al. Secular changes in cardiovascular risk factors over 30 years in Swedish men aged 50: the study of men born in 1913, 1923, 1933 and 1943. *J Intern Med* 2000;247:111-118.
- (25) Noppa H, Bengtsson C. Obesity in relation to smoking: a population study of women in Göteborg, Sweden. *Prev Med* 1980;9:534-543.
- (26) Cremer P, Elster H, Labrot B, Kruse B, Muche R, Seidel D. Incidence rates of fatal and nonfatal myocardial infarction in relation to the lipoprotein profile: first prospective results from the Gottingen Risk, Incidence, and Prevalence Study (GRIPS). *Klin Wochenschr* 1988;66 Suppl 11:42-49.
- (27) Syddall HE, Aihie Sayer A, Dennison EM, Martin HJ, Barker DJ, Cooper C. Cohort profile: the Hertfordshire cohort study. *Int J Epidemiol* 2005;34:1234-1242.
- (28) Norman PE, Flicker L, Almeida OP, Hankey GJ, Hyde Z, Jamrozik K. Cohort Profile: The Health In Men Study (HIMS). *Int J Epidemiol* 2009;38:48-52.
- (29) Kagan A, Popper JS, Rhoads GG. Factors related to stroke incidence in Hawaii Japanese men. The Honolulu Heart Study. *Stroke* 1980;11:14-21.
- (30) Mooy JM, Grootenhuys PA, de VH et al. Prevalence and determinants of glucose intolerance in a Dutch caucasian population. The Hoorn Study. *Diabetes Care* 1995;18:1270-1273.
- (31) Pischon T, Girman CJ, Hotamisligil GS, Rifai N, Hu FB, Rimm EB. Plasma adiponectin levels and risk of myocardial infarction in men. *JAMA* 2004;291:1730-1737.
- (32) Iso H, Naito Y, Sato S, Kitamura A, Okamura T, Sankai T, Shimamoto T, Iida M, Komachi Y. Serum triglycerides and risk of coronary heart disease among Japanese men and women. *Am J Epidemiol* 2001;153:490-499.
- (33) Mykkanen L, Laakso M, Penttila I, Pyorala K. Asymptomatic hyperglycemia and cardiovascular risk factors in the elderly. *Atherosclerosis* 1991;88:153-161.
- (34) Huisman M, Poppelaars J, van der Horst M, Beekman AT, Brug J, van Tilburg TG, Deeg DJ. Cohort profile: the Longitudinal Aging Study Amsterdam. *Int J Epidemiol* 2011;40:868-876.
- (35) Meade TW. Design and intermediate results of the Lower Extremity Arterial Disease Event Reduction (LEADER)\* trial of bezafibrate in men with lower extremity arterial disease [ISRCTN4119421]. *Curr Control Trials Cardiovasc Med* 2001;2:195-204.
- (36) Berglund G, Eriksson KF, Israelsson B, Kjellström T, Lindgärde F, Mattiasson I, Nilsson JA, Stavenow L. Cardiovascular risk groups and mortality in an urban swedish male population: the Malmö Preventive Project. *J Intern Med* 1996;239:489-497.
- (37) Hoeymans N, Smit HA, Verkleij H, Kromhout D. Cardiovascular risk factors in relation to educational level in 36 000 men and women in The Netherlands. *Eur Heart J* 1996;17:518-525.
- (38) Enhorning S, Bankir L, Bouby N et al. Copeptin, a marker of vasopressin, in abdominal obesity, diabetes and microalbuminuria: the prospective Malmo Diet and Cancer Study cardiovascular cohort. *Int J Obes (Lond)* 2012.
- (39) Welsh P, Doolin O, McConnachie A, Boulton E, McNeil G, Macdonald H, Hardcastle A, Hart C, Upton M, Watt G, Sattar N. Circulating 25OHD, dietary vitamin D, PTH, and calcium associations with incident cardiovascular disease and mortality: the MIDSPAN Family Study. *J Clin Endocrinol Metab* 2012;97:4578-4587.



- (40) Hawthorne VM, Watt GCM, Hart CL, Hole DJ, Smith GD, Gillis CR. Cardiorespiratory disease in men and women in Scotland: baseline characteristics of the Renfrew/Paisley (Midspan)study population. *Scott Med J* 1995;40:102-7.
- (41) Keil U, Liese AD, Hense HW et al. Classical risk factors and their impact on incident non-fatal and fatal myocardial infarction and all-cause mortality in southern Germany. Results from the MONICA Augsburg cohort study 1984-1992. Monitoring Trends and Determinants in Cardiovascular Diseases. *Eur Heart J* 1998;19:1197-1207.
- (42) Houterman S, Verschuren WM, Oomen CM, Boersma-Cobbaert CM, Kromhout D. Trends in total and high density lipoprotein cholesterol and their determinants in The Netherlands between 1993 and 1997. *Int J Epidemiol* 2001;30:1063-1070.
- (43) Wilhelmsen L, Johansson S, Rosengren A, Wallin I, Dotevall A, Lappas G. Risk factors for cardiovascular disease during the period 1985-1995 in Goteborg, Sweden. The GOT-MONICA Project. *J Intern Med* 1997;242:199-211.
- (44) Fletcher AE, Jones DA, Bulpitt CJ, Tulloch AJ. The MRC trial of assessment and management of older people in the community: objectives, design and interventions [ISRCTN23494848]. *BMC Health Serv Res* 2002;2:21.
- (45) Sherwin R, Kaelber CT, Kezdi P, Kjelsberg MO, Thomas HE Jr. The multiple risk factor intervention trial (MRFIT) II. The development of the protocol. *Prev Med* 1981;10:402-425.
- (46) Bjartveit K, Foss OP, Gjervig T. The cardiovascular disease study in Norwegian counties. Results from first screening. *Acta Med Scand Suppl* 1983;675:1-184.
- (47) Gillum RF, Makuc DM, Feldman JJ. Pulse rate, coronary heart disease, and death: the NHANES I Epidemiologic Follow-up Study. *Am J Epidemiol* 1991;121:172-177.
- (48) Gillum RF, Obisesan TO. Physical activity, cognitive function, and mortality in a US national cohort. *Ann Epidemiol* 2010;20:251-257.
- (49) Davidson KW, Schwartz JE, Kirkland SA, Mostofsky E, Fink D, Guernsey D, Shimbo D. Relation of inflammation to depression and incident coronary heart disease (from the Canadian Nova Scotia Health Survey [NSHS95] Prospective Population Study). *Am J Cardiol* 2009;103:755-761.
- (50) Kitamura A, Sato S, Kiyama M et al. Trends in the incidence of coronary heart disease and stroke and their risk factors in Japan, 1964 to 2003: the Akita-Osaka study. *J Am Coll Cardiol* 2008;52:71-79.
- (51) Haheim LL, Holme I, Hjermmann I, Leren P, Tonstad S. Trends in the incidence of acute myocardial infarction and stroke: a 21-year follow-up of the Oslo study. *Scand Cardiovasc J* 2004;38:216-221.
- (52) Geluk CA, Tio RA, Tijssen JG et al. Clinical characteristics, cardiac events and coronary angiographic findings in the prospective PREVEND cohort: an observational study. *Neth Heart J* 2007;15:133-141.
- (53) Garcia-Palmieri MR, Feliberti M, Costas R, Jr. et al. An epidemiological study on coronary heart disease in PR. The Puerto Rico Heart Health Program. 1969. *Bol Asoc Med P R* 2002;94:61-67.
- (54) Ducimetiere P, Ruidavets JB, Montaye M, Haas B, Yarnell J. Five-year incidence of angina pectoris and other forms of coronary heart disease in healthy men aged 50-59 in France and Northern Ireland: the Prospective Epidemiological Study of Myocardial Infarction (PRIME) Study. *Int J Epidemiol* 2001;30:1057-1062.
- (55) Assmann G, Cullen P, Schulte H. Simple scoring scheme for calculating the risk of acute coronary events based on the 10-year follow-up of the prospective cardiovascular Munster (PROCAM) study. *Circulation* 2002;105:310-315.
- (56) Shepherd J, Blauw GJ, Murphy MB et al. The design of a prospective study of Pravastatin in the Elderly at Risk (PROSPER). PROSPER Study Group. PROspective Study of Pravastatin in the Elderly at Risk. *Am J Cardiol* 1999;84:1192-1197.
- (57) Boker LK, van Noord PA, van der Schouw YT et al. Prospect-EPIC Utrecht: study design and characteristics of the cohort population. European Prospective Investigation into Cancer and Nutrition. *Eur J Epidemiol* 2001;17:1047-1053.
- (58) Dagenais GR, Robitaille NM, Lupien PJ et al. First coronary heart disease event rates in relation to major risk factors: Quebec cardiovascular study. *Can J Cardiol* 1990;6:274-280.
- (59) Barrett-Connor E. The Rancho Bernardo Study: 40 years studying why women have less heart disease than men and how diabetes modifies women's usual cardiac protection. *Glob Heart* 2013;8:95-104.

- (60) Hofman A, Darwish Murad S, van Duijn CM, Franco OH, Goedegebure A, Ikram MA, Klaver CC, Nijsten TE, Peeters RP, Stricker BH, Tiemeier HW, Uitterlinden AG, Vernooij MW. The Rotterdam Study: 2014 objectives and design update. *Eur J Epidemiol* 2013;28:889-926.
- (61) Smith WC, Crombie IK, Tavendale R, Irving JM, Kenicer MB, Tunstall PH. The Scottish Heart Health Study: objectives and development of methods. *Health Bull (Edinb )* 1987;45:211-217.
- (62) Kowall B, Rathmann W, Giani G et al. Random glucose is useful for individual prediction of type 2 diabetes: results of the Study of Health in Pomerania (SHIP). *Prim Care Diabetes* 2013;7:25-31.
- (63) Lee ET, Welty TK, Fabsitz R, Cowan LD, Le NA, Oopik AJ, Cucchiara AJ, Savage PJ, Howard BV. The Strong Heart Study. A study of cardiovascular disease in American Indians: design and methods. *Am J Epidemiol* 1990;132:1141-1155.
- (64) Onat A, Senocak MS. Relative risk of factors for coronary heart disease in population with low cholesterol levels. *Int J Cardiol* 1994;43:51-60.
- (65) Miller NE, Thelle DS, Forde OH, Mjos OD. The Tromso heart-study. High-density lipoprotein and coronary heart-disease: a prospective case-control study. *Lancet* 1977;1:965-968.
- (66) Lind L, Vessby B, Sundstrom J. The apolipoprotein B/AI ratio and the metabolic syndrome independently predict risk for myocardial infarction in middle-aged men. *Arterioscler Thromb Vasc Biol* 2006;26:406-410.
- (67) Hsia J, Aragaki A, Bloch M, LaCroix AZ, Wallace R. Predictors of angina pectoris versus myocardial infarction from the Women's Health Initiative Observational Study. *Am J Cardiol* 2004;93:673-678.
- (68) Clarke R, Breeze E, Sherliker P et al. Design, objectives, and lessons from a pilot 25 year follow up re-survey of survivors in the Whitehall study of London Civil Servants. *J Epidemiol Community Health* 1998;52:364-369.

### **eAppendix 3. UK Biobank**

Details of UK Biobank have been described previously.<sup>1</sup> Briefly, over 500,000 participants aged 40-69 years were recruited during 2006-2010 in 22 geographical centres throughout the United Kingdom. The assessment visit comprised electronic signed consent; a self-completed touch-screen questionnaire; brief computer-assisted interview; physical and functional measures; and collection of biological samples. Participants have been linked with death records of the UK Office for National Statistics through National Health Service identification numbers.<sup>2</sup>

A total of 499,808 participants with complete data on age, sex, and medical history of diabetes, stroke and myocardial infarction were included in the current analysis. Medical history of diabetes, stroke and myocardial infarction was defined using self-reported information recorded at baseline visit in UK Biobank and updated using information on hospitalization before baseline extracted from Hospital Episode Statistics (using the following ICD codes: I21-I22 for history of myocardial infarction; I60, I61, I63, I64 for history of stroke). Information on smoking status, level of education (as measure of socioeconomic status), and fruit and meat consumption were collected using the touchscreen questionnaire at baseline visit. Body mass index was calculated ( $\text{kg}/\text{m}^2$ ) using measured height and weight. Weight was measured using the Tanita BC-418 MA body composition analyser (accurate to within 0.1kg) after removal of heavy clothing and shoes. Standing height was measured without shoes using a Seca 202 height measure. Blood pressure was measured using the Omron HEM-7015IT digital blood pressure monitor.<sup>2</sup> The mean of two measurements taken approximately within a minute of each other was used in the analysis. The UK Biobank study was approved by the North West Multi-centre Research Ethics Committee (MREC) and all participants provided written informed consent to participate in the UK Biobank.

#### **Statistical analysis**

Participants were categorized into eight mutually exclusive groups according to baseline disease, ie: 1) diabetes only; 2) stroke only; 3) MI only; 4) diabetes and MI only; 5) diabetes and stroke only; 6) stroke and MI only; 7) diabetes, stroke and MI; 8) none of these (reference group). Hazard ratios and 95% CI for all-cause mortality were calculated using Cox proportional-hazards regression models. The primary analysis adjusted for age and sex only. Secondary analyses were additionally adjusted for smoking status, education level, body mass index, systolic blood pressure, and diet (fruit intake and meat consumption). Data were analysed using Stata version 12.1

#### **Reference List**

- (1) Sudlow C, Gallacher J, Allen N et al. UK biobank: an open access resource for identifying the causes of a wide range of complex diseases of middle and old age. *PLoS Med* 2015;12(3):e1001779.
- (2) UK Biobank (2007). Protocol for a large-scale prospective epidemiological resource. <http://www.ukbiobank.ac.uk/wp-content/uploads/2011/11/UK-Biobank-Protocol.pdf> (accessed May 11, 2015).

## eAppendix 4. Systematic review

### Data Sources and Searches

Studies published between January 1970 and April 2015 were identified, without any language restriction, through electronic searches using MEDLINE, and supplemented by scanning reference lists of articles identified. The computer-based search strategy is detailed below.

### Study Selection

Prospective observational studies were included if they had reported on the association of cardiometabolic morbidity (ie, people with a baseline history of at least two of the conditions diabetes, stroke, and myocardial infarction) with all-cause mortality. Observational studies were eligible if had recorded at least one year of follow-up and involved participants from approximately general populations (ie, participants not selected on the basis of pre-existing disease at baseline). Studies were not eligible for the review if they had contributed data to the Emerging Risk Factors Collaboration. A literature search flow chart is provided below.

### Data Extraction

Data on the following characteristics were extracted independently by two investigators (PW and LOK) according to a pre-specified protocol: study location, sampling population, year of baseline survey, date of last follow-up, duration of follow-up, age range of participants at baseline, gender, sample size, numbers of deaths, reported hazard ratios for mortality associated with  $\geq 2$  cardiometabolic conditions (ie, diabetes, stroke, and myocardial infarction), and degree of statistical adjustment used. Discrepancies were resolved by discussion and by adjudication of a third reviewer (EDA). We used the most up-to-date or comprehensive information in cases of multiple publications.

### Search strategy

|                              |                                                                                                                                                                                               |
|------------------------------|-----------------------------------------------------------------------------------------------------------------------------------------------------------------------------------------------|
| #1                           | "history of" or "prior" or "pre-existing" or "prevalent" or "existing" or "comorbidity"                                                                                                       |
| #2                           | "Myocardial infarction" OR "coronary heart disease" OR stroke OR diabetes                                                                                                                     |
| #3                           | Mortality[Mesh] OR mortality OR death OR survival                                                                                                                                             |
| #4                           | "Cohort Studies"[Mesh] OR cohort OR prospective OR "risk ratio" OR "relative risk" OR "hazard ratio" OR "rate ratio" OR "risk ratios" OR "relative risks" OR "hazard ratios" OR "rate ratios" |
| #5                           | "Animals"[Mesh] NOT "Humans"[Mesh]                                                                                                                                                            |
| <u>Search:</u>               | (#1 AND #2 AND #3 AND #4) NOT #5                                                                                                                                                              |
| <u>Restrictions:</u>         | None                                                                                                                                                                                          |
| <u>Publication database:</u> | MEDLINE                                                                                                                                                                                       |
| <u>Result:</u>               | 13,422 citations                                                                                                                                                                              |

**Literature search flow chart**

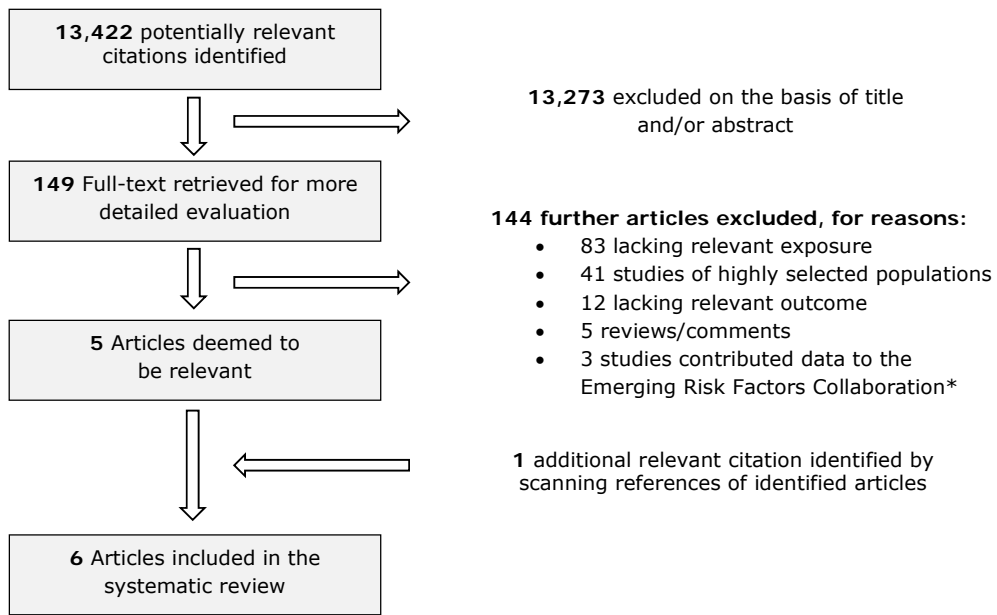

\* British Regional Heart Study (BRHS), Cardiovascular Health Study (CHS), and MIDSPAN Renfrew & Paisley Study (MIDRP).

## eAppendix 5. Statistical methods used for estimating years of life lost.

We used three pieces of information to estimate reductions in life expectancy associated with a history of disease at baseline (henceforth “exposure groups”):

- (i) age-at-risk specific hazard ratios for all-cause (and cause-specific) mortality in each exposure group versus the reference (derived from the ERFC);
- (ii) population all-cause (and cause-specific) mortality rates (derived from the detailed mortality component of the CDC WONDER database of the US Centers for Disease Control and Prevention); and
- (iii) prevalence of exposure groups in the population (derived from the ERFC).

We estimated population survival curves for each of 8 exposure groups, utilising estimated age-at-risk specific hazard ratios for mortality by exposure groups in the ERFC and routine statistics on overall population mortality rates. We estimated reductions in life-expectancy as differences in areas under any two survival curves compared. To calculate an appropriate mortality rate for the reference group (i.e. those without disease morbidity), we used ERFC data on exposure prevalence estimates, as described below.

Age-at-risk specific hazard ratios for mortality by exposure groups were estimated from ERFC data separately for each sex. Specifically, a Cox regression model stratified by cohort and trial arm (where applicable) was fitted separately for each sex using a dataset in which participant ages-at-risk were deterministically updated by splitting the follow up times every 5-years and recalculating an age-at-risk variable at the beginning of each 5-year interval of follow up. Interactions between baseline exposure groups and linear and quadratic terms for the age-at-risk variable were included in the model to obtain smoothed hazard ratios. Thus, for participant  $i$  in stratum  $s$  with exposure group indicator variable  $E_{si(j)}$  (i.e. dummy variable equal to 1 if in exposure group is  $j$  and zero otherwise) the log hazard rate at time  $t$  since baseline was modelled as:

$$\log(h_{si}(t)) = \log(h_{s0}(t)) + \sum_{j=1}^7 \gamma_{0j} E_{si(j)} + \beta_2 \text{agerisk}_{si} + \beta_3 \text{agerisk}_{si}^2 + \sum_{j=1}^7 \gamma_{1j} E_{si(j)} \times \text{agerisk}_{si} + \sum_{j=1}^7 \gamma_{2j} E_{si(j)} \times \text{agerisk}_{si}^2 \quad (1)$$

from which the age-at-risk specific hazard ratios (and 95% CIs) for mortality were obtained as linear combinations of the relevant estimated coefficients, with age-at-risk fixed at values corresponding to midpoints of 5-year age-groups from age 40 onwards (**Figure 1**).

Population all-cause (and cause-specific) mortality rates per 100,000 were obtained in 5-year age-groups for the US population during years 2007-2010 from the Center for Disease Control (CDC) WONDER online database (<http://wonder.cdc.gov/controller/datarequest/D76>) (**Figure 2**), as well as for 15 EU countries during year 2000 (<http://ec.europa.eu/eurostat/data/database>). Because the mortality rates were provided only up to age-group 80-84 years, but we desired to estimate the overall population survival curves, we used a Poisson regression model with linear and quadratic terms for the midpoints of 5-year age-groups to smooth and extrapolate the mortality rates (**Figure 3**). Next, assuming exponential survival (i.e. constant hazard) within each 5-year age group, we estimated the age-specific survival probability as  $S_a = \exp(-5 \times IR_a)$  and derived the overall population survival curves from age 35 onwards as the product of the relevant age-group specific survival probabilities (**Figure 4**).

$$p(\text{survival} | \text{agerisk} \geq 35) = \prod_{\text{agerisk} \geq 35} S_a \quad (2)$$

In order to infer population mortality rates appropriate for the reference exposure group used in our estimation of age-specific hazard ratios (i.e. those without disease morbidity), we used logistic regression to model the age-specific prevalence of (co)morbidity in ERFC cohorts by sex and decade of recruitment (**Figure 5**). We used the age-specific prevalence estimates for the decade commencing in the year 1990 to infer the age-specific mortality rates appropriate for our reference group  $IR_{a0}$  as:<sup>1</sup>

© 2015 American Medical Association. All rights reserved.

$$IR_{a0} = \frac{IR_a}{p_{a0} + \sum_{j=1}^7 p_{aj} \times RR_{aj}} \quad (3)$$

Where  $IR_a$  is the population mortality rate for age group  $a$ ,  $p_{aj}$  is the age-specific prevalence of exposure group  $j$ , and  $RR_{aj}$  is the age-specific hazard ratio in comparison of exposure group  $j$  versus reference group ( $j = 0$ ). The age-specific mortality rates in each of the non-reference exposure groups were then inferred in turn by multiplying the age-specific mortality rate for the reference group  $IR_{a0}$  by the age-specific hazard ratios  $RR_{aj}$  based on ERFC data and equation (2) above used to infer the exposure group-specific population survival curves (**Figure 6**). Finally, reductions in life expectancy according to baseline disease (co)morbidity groups were estimated as difference in the areas under the survival curves for the reference group and each of the disease (co)morbidity groups in turn (**Figure 7**). The areas under curves were calculated by numerical integration.

#### Appendix References

- 1 Woloshin S, Schwartz LM, Welch HG. The risk of death by age, sex, and smoking status in the United States: putting health risks in context. *J Natl Cancer Inst* 2008;100(12):845-53.

## eAppendix 5. Figures

**Figure 1.** Age-at-risk specific hazard ratios for all-cause mortality by sex and exposure groups estimated from ERFC data.

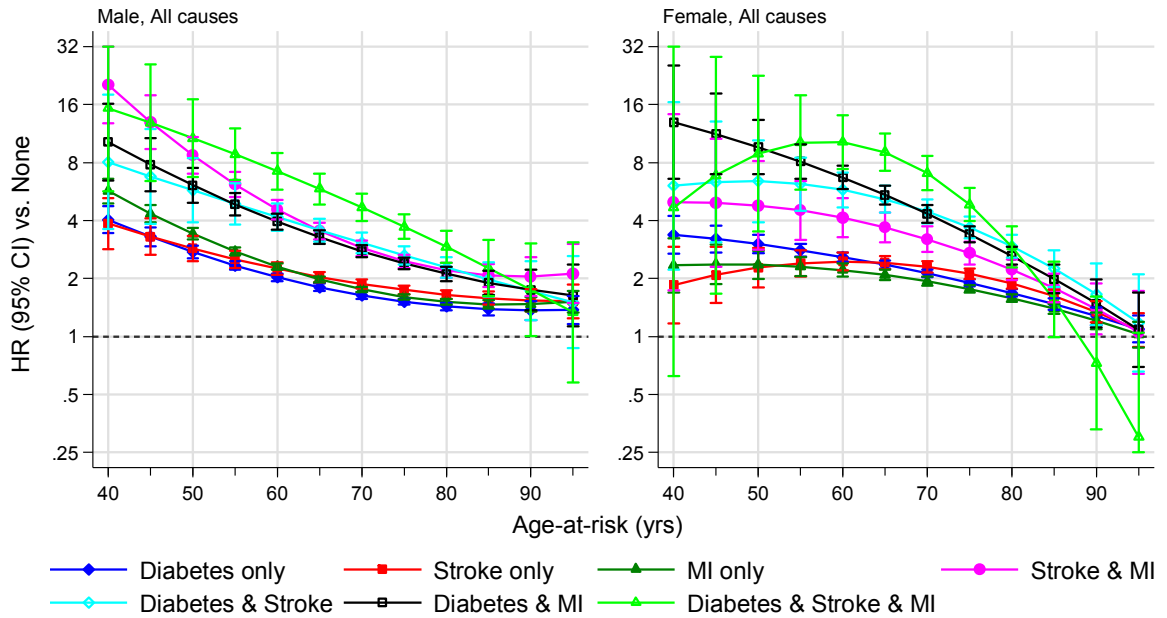

**Figure 2.** US population mortality rates during year 2007 - 2010 downloaded from CDC WONDER online database.\*

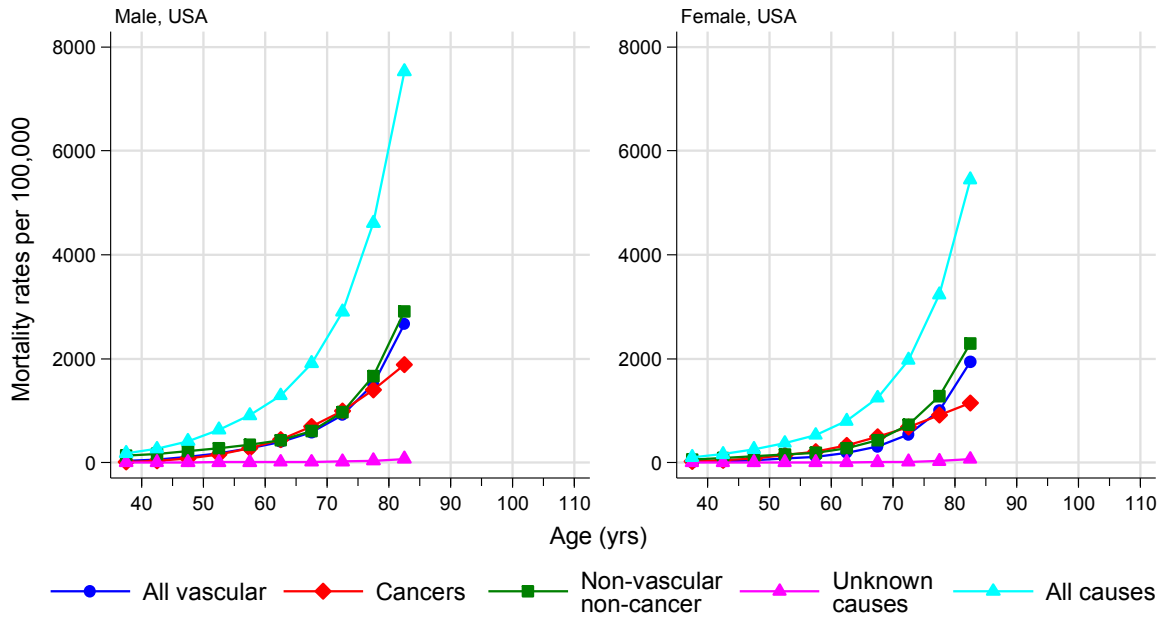



\* To maintain consistency with analyses conducted in ERFC, the mortality rate for non-vascular non-cancer causes was recalculated as the difference of all-cause mortality and the sum of vascular mortality (I00-I99), cancer mortality (C00-D48), and unknown causes of mortality (R00-R99).

**Figure 3.** Assessment of adequacy of a Poisson model used to smooth and extrapolate US population mortality rates during years 2007 - 2010 downloaded from CDC WONDER online database beyond the database's upper bound age cut-off of 84 years to facilitate modelling.

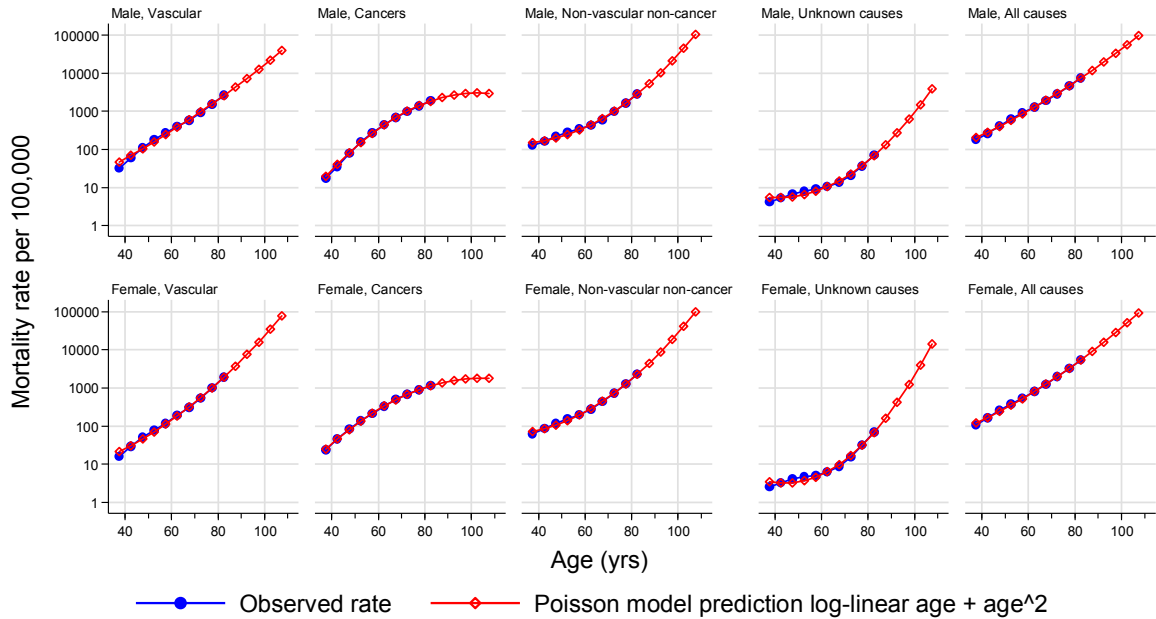

**Figure 4.** Derived population survival curves for all-cause and cause-specific mortality from age 35 years based on smoothed and extrapolated US population mortality rates 2007 - 2010.

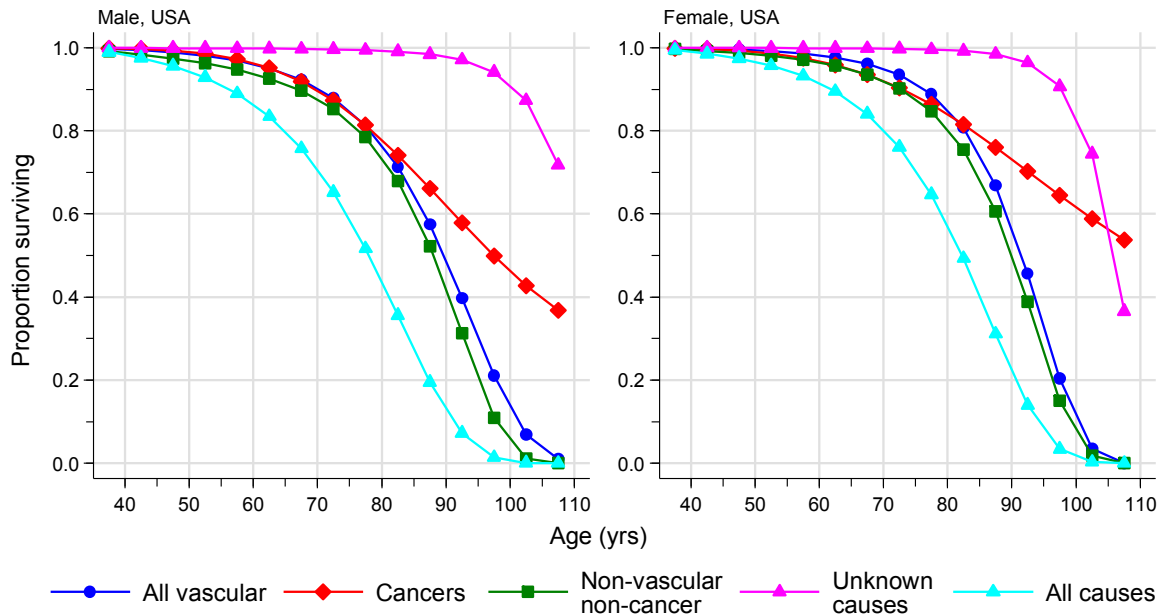

**Figure 5.** Modelled age-specific prevalence of (co)morbidity in ERFC cohorts by sex and decade of recruitment.

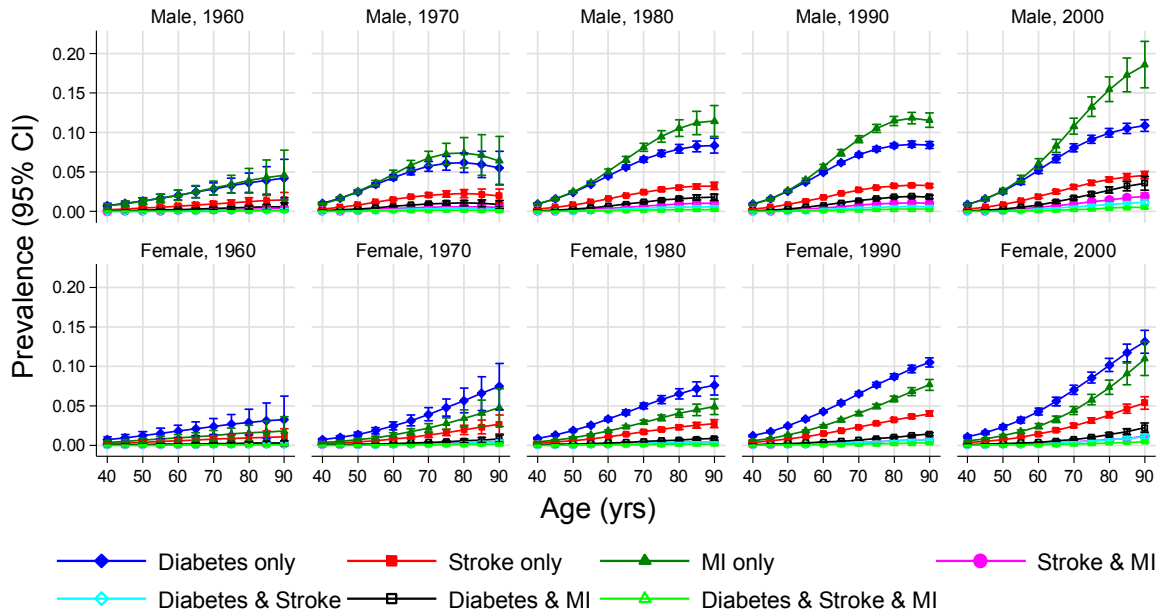

**Figure 6.** Inferred survival curves for US population by sex and baseline disease morbidity.

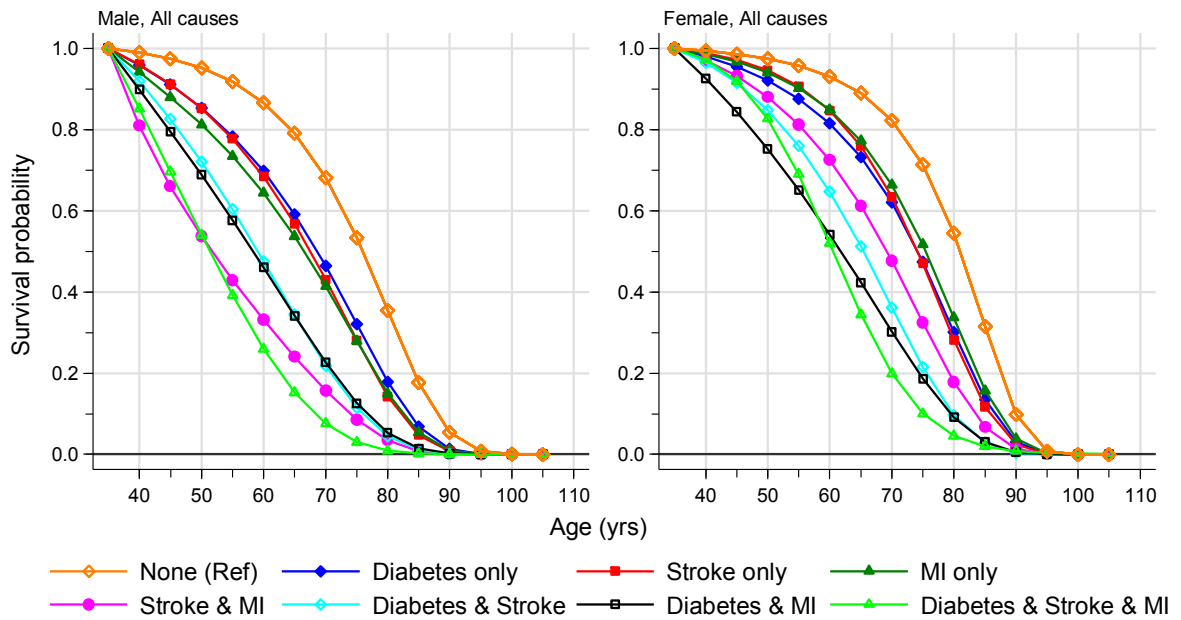

**Figure 7.** Estimated sex-specific reductions in life expectancy in the US population according to baseline disease morbidity.

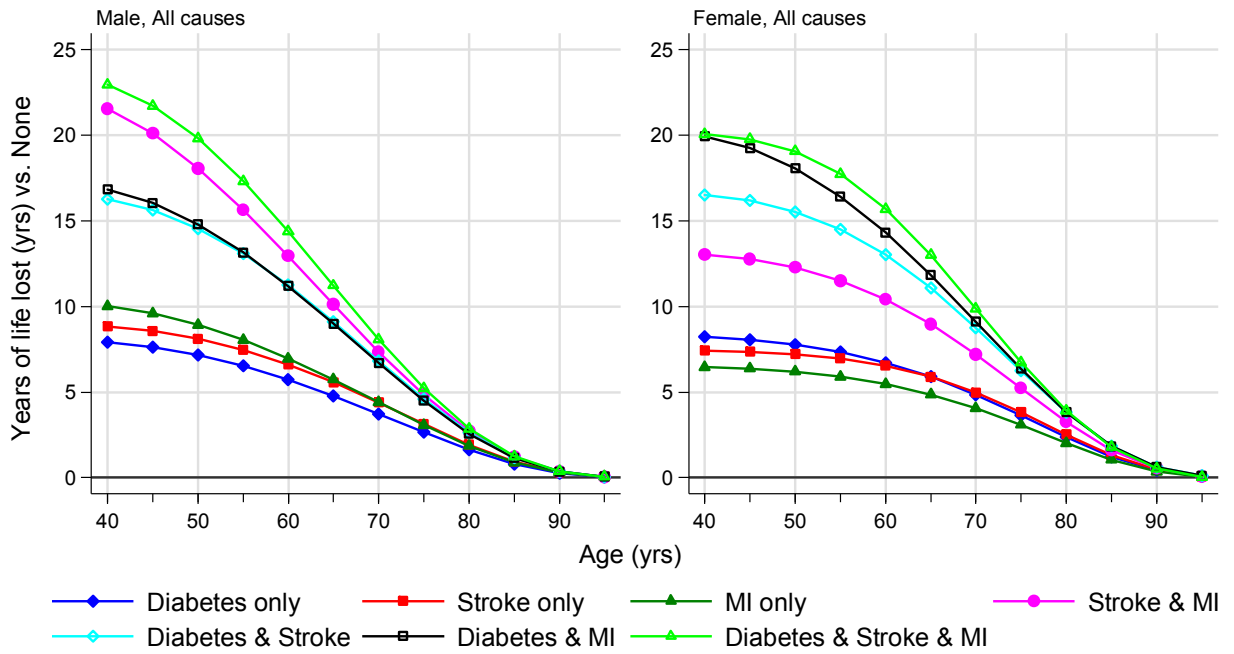

Supplement: NIHMS739076-supplement-Supplemental_Content.pdf [file NIHMS739076-supplement-Supplemental_Content.pdf]
